# Supplementary material for: The exon junction complex regulates the splicing of cell polarity gene dlg1 to control Wingless signaling in development
Source: eLife. 2016 Aug 18;5:e17200. doi: 10.7554/eLife.17200 (PMC5008907; doi:10.7554/eLife.17200)
Supplement: Supplementary file 2. — Two criteria were used to determine candidate genes that are subject to the regulation by the pre-EJC: 1) the mRNA abundance values (measured by FPKM method) are above 10 in either tsu or lacZ samples (except for the value of sens that is listed at the bottom of the table), and 2) the expression levels are changed by more than 25% in the tsu sample. In total, 1447 genes were identified, in which the expression of 818 genes was downregulated. DOI: http://dx.doi.org/10.7554/eLife.17200.029 [file elife-17200-supp2.xlsx]

## Sheet: Gene_exp
Supplementary file 2. RNA-seq analyses identify candidate genes whose mRNA expression are subject to the pre-EJC regulation.
Gene	tsu RNAi FPKM	lacZ FPKM	tsu/lacZ
CG10513	0	31.1428	0
CG13947	0	1806.97	0
mt:ND1	0	39698	0
ng3	0	81.2169	0
snoRNA:Psi18S-1275	0	53	0
snoRNA:Psi18S-1377b	0	271.283	0
snoRNA:Psi18S-1377e	0	314.05	0
snoRNA:Psi18S-1397	0	48.4787	0
snoRNA:Psi18S-841b	0	79.5303	0
snoRNA:Psi28S-1837a	0	75.0479	0
snoRNA:tra2-a	0	80.6547	0
Sgs5	0.587574	543.412	0.00108127
Sgs4	0.108564	71.9846	0.00150816
Eig71Ee	0.153067	101.083	0.00151427
CG12310,CG18581,CG43679	0.406059	242.408	0.00167511
Sgs8	1.1277	653.288	0.00172619
Sgs3	0.383426	213.048	0.00179972
Sgs7	4.00465	1958.88	0.00204436
Cyp4p2	0.0894747	42.639	0.00209842
CG13460	0.0988552	36.5999	0.00270097
CG7606	0.189257	69.1775	0.00273582
CG34278	1.51892	78.8496	0.0192635
snoRNA:Psi28S-3436a	30.2256	332.734	0.0908401
CG15905	17.9598	193.169	0.0929745
CG34296	4.50501	46.9783	0.0958956
snoRNA:Psi28S-2648	5.11344	47.5366	0.107568
CG14257	3.81084	31.2599	0.121908
tsu	15.9371	129.042	0.123503
snoRNA:Psi18S-920	31.9144	228.726	0.139531
MtnA	20.0722	142.337	0.141019
CG15282	18.6985	129.36	0.144546
Obp56a	13.0899	90.0858	0.145305
ImpE2	311.38	2052.29	0.151723
CG43117,CG5447	26.4648	173.385	0.152636
snRNA:U12:73B	18.4367	118.239	0.155927
Spn100A	11.191	69.675	0.160617
Dbp80	32.2117	191.72	0.168014
snoRNA:2R:9445410	6.68517	38.667	0.172891
St2	11.9346	61.3085	0.194665
snoRNA:Psi28S-1192c	47.0565	237.5	0.198133
CG3823	8.82738	42.1619	0.209369
snoRNA:Psi28S-1060	58.2375	277.825	0.209619
snoRNA:Psi28S-2149	40.0577	191.074	0.209645
CG4382	19.2817	91.6288	0.210433
hbs	7.79369	35.7736	0.217861
CG9416	13.8949	61.2329	0.226919
ImpE1	15.6304	67.8189	0.230473
lt	11.1778	44.9304	0.24878
ImpE3	26.1276	102.268	0.255482
CG9628	49.994	191.097	0.261616
pho	23.1093	87.6967	0.263514
CG11905	14.8272	56.0824	0.264382
CG4914	32.3036	121.894	0.265014
Sans	15.3449	55.6387	0.275795
CG12547	22.3672	79.4724	0.281446
CG33774	83.3982	291.554	0.286047
CG1311	20.7925	72.0769	0.288477
Stlk	16.2563	55.6043	0.292357
neo	22.1996	74.7997	0.296787
CG11665	17.7378	58.9216	0.301041
pncr013:4	23.3315	77.2296	0.302106
yellow-e2	9.7615	32.1179	0.303927
Tim17b	141.178	457.671	0.30847
CG17683	26.0407	82.7656	0.314632
snoRNA:Psi28S-1192a	20.2973	63.7107	0.318585
wbl	44.7086	130.642	0.342222
snoRNA:Psi28S-3327b	14.7195	42.0715	0.349869
CG40127	165.877	469.266	0.353482
Spn43Aa	81.1441	227.971	0.35594
Fkbp13	66.4903	186.117	0.35725
MFS17	16.2054	44.7365	0.362241
CG41378	32.3485	89.0994	0.363061
cta	12.6973	34.6821	0.366105
CG40002,CG40472	61.6884	165.632	0.372443
shf	23.9275	64.0611	0.373511
rl	35.352	94.5966	0.373713
Cpr49Ac	60.4208	161.339	0.374496
snoRNA:Psi28S-3405b	19.7942	52.6651	0.37585
uex	19.9285	52.8789	0.376871
CR41604	19.9158	52.6062	0.378583
CG10933,CG10934	30.304	79.4483	0.38143
CG4586	12.8931	33.6589	0.383052
Hsp27	697.76	1808.19	0.385889
CG17691	64.8234	166.925	0.388338
CG17698	15.7686	40.1971	0.392282
Nep2	15.9821	40.7209	0.392479
Cht3	83.7423	210.284	0.398234
mth	39.4933	99.0129	0.39887
128up	32.5203	81.3525	0.399746
Tsp39D	26.248	65.5503	0.400425
GATAd	16.8914	42.1006	0.401215
CR43995	17.9494	44.5713	0.402712
bip1	55.0858	136.421	0.403793
snoRNA:Psi28S-291	17.2749	42.3231	0.408167
SP1029	13.1439	32.1169	0.409252
snoRNA:Or-CD2	37.1277	90.6545	0.409552
Cpr78E	23.998	58.514	0.410124
CG17883	53.0194	127.593	0.415535
CG9008	17.6048	42.3384	0.415812
CG5758	23.4531	56.0532	0.418408
CG7646,Nca	47.8529	113.815	0.420445
fok	15.5382	36.7081	0.423291
CG5630	37.4585	88.3236	0.424105
CaMKII	38.5538	90.7901	0.424648
MED21	37.8566	88.7212	0.426692
CG6287	95.7442	223.725	0.427955
CG32447	21.3059	49.5259	0.430197
CG13373	13.5715	31.5315	0.430411
CG8149	30.4793	70.687	0.431187
CG40160	47.3088	109.279	0.432918
HmgD	704.578	1619.03	0.435185
CG3262	64.043	146.895	0.435978
CG32448	16.5597	37.948	0.436379
E(spl)	16.0611	36.6323	0.438441
Nrt	15.4777	35.2093	0.439591
CG8501	21.587	49.0689	0.439932
CG13698	20.7793	47.0009	0.442104
Hsp26	85.7273	193.856	0.442222
pen-2	26.2509	59.2642	0.442947
mdy	14.0892	31.7761	0.44339
CG11374,galectin	16.1105	36.2138	0.444872
SC35	114.733	257.724	0.445178
CG17715	34.6274	77.6603	0.445883
Mo25	35.3529	79.2676	0.445994
Gprk1	43.479	96.7412	0.449436
CG17278	110.84	246.501	0.449653
CG33276	30.925	68.7677	0.449702
Crk	83.8461	186.003	0.450778
CG1607	85.2725	187.409	0.455007
CG6583	47.224	103.787	0.455009
pim	29.9176	65.4072	0.457405
smi35A	16.6288	36.335	0.457652
CG9362	18.9632	41.4003	0.458045
magu	25.4197	55.2841	0.459801
CG13053	33.5692	72.1811	0.465069
glec	19.7856	42.4433	0.466165
spi	85.1399	182.092	0.467565
myo	25.522	54.5817	0.467593
PMCA	59.6627	127.476	0.468031
CG11899	97.5497	208.1	0.468764
Maf1	36.904	78.4407	0.47047
snoRNA:Psi28S-2179	20.9777	44.5608	0.470766
CG2316	44.7038	94.0497	0.475321
Ama	112.536	236.399	0.476043
Dll	14.8705	31.1426	0.477497
CG34279,CG34280,Sur-8	21.5561	44.9686	0.479359
nub	31.1412	64.7603	0.480869
nmo	32.0956	66.5187	0.482505
CG40045	214.979	445.502	0.482555
CG11686	84.417	174.694	0.483228
CG42498	41.3993	85.0798	0.486594
CG10960	30.8465	63.3211	0.487144
CG7102	15.0677	30.9221	0.487279
CG10395	19.1071	39.1213	0.488407
CG40228	125.59	255.463	0.491617
Fbp1	46.5889	93.8927	0.496193
CG11360	30.8119	62.0276	0.496745
CrebA	19.4911	39.0723	0.498847
mRpL33	88.6473	177.317	0.499937
proPO-A1	15.7126	31.3357	0.501428
mt:ND2	46.0091	91.1456	0.504787
spt4	67.3227	133.093	0.505832
CG2016	15.6676	30.9611	0.506041
CG2177	45.4838	89.6866	0.507142
GV1	45.5061	89.4139	0.508938
CG12279	60.5677	118.498	0.511128
tud	23.8699	46.5852	0.512392
CG6479	17.7082	34.5079	0.513164
CG41128	222.814	429.699	0.518535
HLHmdelta	19.2946	37.1886	0.518831
CG42550	36.6935	70.685	0.519113
CG7484	58.7191	112.116	0.523735
CG32000	51.8864	99.0683	0.523744
CG9662	49.0142	93.5768	0.523786
CG9471	20.986	40.0169	0.524428
Npc1a	22.4602	42.8266	0.524445
CG18428	18.7161	35.6686	0.524722
MED22	41.1515	78.0232	0.527426
CG31922	17.8923	33.7861	0.529576
CG11781	42.7984	80.7784	0.529825
CG8498	79.0073	149.007	0.530225
CG17082	42.3065	79.7669	0.530377
Sema-2a	107.281	201.768	0.531705
CG14464	102.625	192.492	0.533139
Eph	44.9547	84.3048	0.53324
MED10	43.6433	81.8444	0.533247
cdc2c	32.3151	60.4101	0.534929
CG14977	36.9036	68.9831	0.534966
mnd	18.1565	33.9149	0.535355
CG2444	20.5615	38.3501	0.536152
CG17454	41.9754	78.2517	0.536415
cals	55.7816	103.874	0.537012
CG32576	25.5066	47.4753	0.53726
WRNexo	24.7041	45.934	0.537817
obst-A	78.4796	145.702	0.538631
CG31997	197.559	366.001	0.539777
Yippee	17.0047	31.4996	0.539839
vg	30.0674	55.5429	0.541337
Eip75B	22.1034	40.82	0.541485
kune	129.071	237.668	0.543073
CG15168	58.3088	107.339	0.543221
CG5727,CG5731	26.9772	49.6539	0.543305
CG17471	74.246	136.512	0.543879
Rala	26.7478	49.1379	0.544342
Oscillin	58.3282	106.81	0.546093
Ref1	143.101	261.839	0.546523
CG30440	30.7666	56.1726	0.547715
slgA	26.136	47.6812	0.548141
fra	18.4345	33.5814	0.54895
MP1	47.9443	87.1731	0.54999
CG11030	25.6327	46.5453	0.550704
CG10418	81.0517	146.974	0.55147
Pli	21.7312	39.372	0.551946
mRpL20	47.1022	85.2594	0.552458
miple2	235.499	426.055	0.552743
Alg-2	77.7963	140.58	0.553395
CR43432	77.2921	139.632	0.553541
vih	50.7616	91.1379	0.556976
vtd	37.5144	67.2861	0.557536
Cdk4	37.7938	67.756	0.557793
Rab8	36.7018	65.6904	0.558709
CG40191	51.4409	92.0238	0.558996
CG14482	222.539	397.643	0.559645
CG2219	47.5665	84.9053	0.56023
CG17493	81.7773	145.824	0.560795
Pur-alpha	31.9923	56.9377	0.561883
CG4980	25.1981	44.7628	0.562925
rn	20.1281	35.7548	0.562948
Dim1	32.2868	57.185	0.564603
cdc2	134.606	237.834	0.565966
CG8436	28.6559	50.6044	0.566273
CG14309,CG7675	144.91	255.355	0.567484
blos3	20.5987	36.2935	0.567559
crok	61.9516	109.007	0.568327
TfIIA-S	137.875	242.573	0.568386
m2	30.8333	54.1854	0.569033
CG13567	23.5019	41.2319	0.569993
sxc	45.0926	79.077	0.570237
CG32243	40.162	70.4223	0.570302
CG34104	17.7225	31.0511	0.570753
Hr39	22.2438	38.9442	0.571171
CG3689	77.7473	135.929	0.57197
arr	25.0595	43.7418	0.572896
mub	55.8011	97.2985	0.573504
HLHm7	20.9197	36.4485	0.573952
CG4747	90.8307	157.998	0.574885
CBP	77.168	134.194	0.575048
PO45	20.4619	35.5543	0.575511
l(2)gl	49.804	86.4917	0.575824
inv	18.2819	31.7458	0.575884
l(3)73Ah	17.3307	30.0867	0.576025
Manf	85.2336	147.613	0.577413
Rsf1	107.027	185.182	0.577956
Srp9	48.7241	84.2726	0.578173
CG13585	39.2103	67.6798	0.57935
CG8860	422.63	729.455	0.579378
ial	39.0127	67.2072	0.580484
bbg	28.0278	48.2549	0.580828
bip2	37.2844	64.0503	0.582111
bs	21.2136	36.4247	0.582396
plexA	53.1805	91.2292	0.582933
CG17721	28.9707	49.6969	0.582948
CG33108,LSm3	97.5379	167.058	0.583857
CG3625	33.5886	57.4715	0.584439
Spase22-23	102.591	174.921	0.586499
CG15012	80.42	136.704	0.588278
Ance	210.076	356.591	0.589123
RnrS	80.2345	136.1	0.589526
Srp14	73.1296	124.048	0.589527
Adf1	51.3758	87.0436	0.590231
vvl	73.9225	125.107	0.590874
Yeti	142.966	241.935	0.590927
CG5385	32.7971	55.3818	0.5922
CG6776	173.69	292.955	0.59289
gp210	41.715	70.3249	0.593175
Bet3,Nf-YA	31.0929	52.4157	0.593198
CG7830	98.9554	166.689	0.593653
Sod3	147.065	247.194	0.594938
Spp	82.8137	139.099	0.595358
KdelR	148.372	249.173	0.595458
CG32276	334.596	561.875	0.595499
Sec61gamma	212.168	356.273	0.595521
CG17271	48.3345	81.1165	0.595865
CG6234	36.8662	61.8392	0.596162
Tango11	31.7978	53.1329	0.598458
Ent1	25.0808	41.8569	0.599203
Uch-L3	82.9093	138.318	0.599411
CG15922	29.7324	49.6022	0.599417
Sppl	33.7944	56.3759	0.599448
CG16734	19.1967	32.0094	0.599721
CkIIbeta	96.0999	160.213	0.599826
Mitf	32.4865	54.0991	0.6005
CG34310	38.301	63.7756	0.600559
Lsd-2	100.012	166.127	0.602021
Cat	140.297	232.519	0.603379
CG6610	93.5948	155.11	0.603409
CG14646	18.4884	30.632	0.603565
CG15387	46.1227	76.2972	0.604514
CG15525	18.2594	30.1993	0.60463
smo	23.236	38.3699	0.605579
how	32.2524	53.2581	0.605587
CG11069	38.5912	63.7074	0.605757
CG9921	23.7289	39.1587	0.605968
hth	119.314	196.695	0.606594
CG8929	49.3874	81.1905	0.60829
Ppn	40.0561	65.8232	0.608541
en	24.8684	40.8272	0.609114
CG3652	21.0903	34.611	0.609353
Acyp2	29.0071	47.5403	0.610158
CG9578	30.7027	50.2912	0.610498
Rpd3	104.649	171.35	0.610732
CG9669	239.003	389.496	0.613621
Tif-IA	48.2811	78.6657	0.61375
Pten	23.0082	37.4638	0.614145
CG6805	26.6623	43.374	0.614707
NijA	65.8065	107.021	0.614893
CG2310	69.1404	112.23	0.61606
CG3603	20.8187	33.7823	0.616261
PRL-1	64.1095	103.942	0.616781
CG9894	679.971	1102.11	0.616972
LSm7	129.147	208.932	0.618129
CG5694,CG5708	70.6451	114.265	0.618257
CG17331	193.788	313.289	0.61856
CG3700,MED23	21.3107	34.4169	0.619193
HSPC300	91.5774	147.828	0.619486
Fas3	172.21	277.816	0.619871
CG5181	25.4275	40.955	0.620864
CG1969	103.269	166.289	0.621021
Ucrh	332.629	535.516	0.621137
Chrac-16	49.1722	79.1449	0.621293
ogre	206.758	332.645	0.621558
Idh	283.187	455.26	0.622034
e(r)	54.9977	88.4128	0.622056
CG31344,Rpb7	45.5416	73.1742	0.622372
CG31855	28.013	44.9548	0.623137
icln	70.7142	113.415	0.6235
grh	38.8311	62.2643	0.62365
CG11768,CG34135	27.2585	43.7039	0.623709
CG9996	31.3956	50.2575	0.624695
kuk	133.108	212.577	0.626164
CG12895	36.4701	58.2128	0.626496
jigr1	43.9913	70.1572	0.627039
His2Av	509.947	813.09	0.627172
CG1832	44.2737	70.576	0.627319
CG13865	32.4402	51.6736	0.627791
CG32152,CG5151,CG5157	27.8512	44.3227	0.628373
M6	49.5973	78.8802	0.628767
alpha-Cat	72.6681	115.472	0.629314
plexB	19.6627	31.2347	0.629515
Df31	1961.39	3115.07	0.629646
gus	87.1578	138.366	0.629908
CG12857,Spred	23.7659	37.6727	0.630852
CG15881	57.0548	90.4348	0.630894
CG31360	40.7733	64.6198	0.630972
CG10465	74.7445	118.441	0.631069
fy	19.4666	30.8024	0.631983
CG11307	23.7411	37.5482	0.632283
bai	146.846	232.23	0.63233
hrg	39.2348	62.0429	0.632382
malpha	137.262	216.895	0.63285
CG10470	44.4872	70.1932	0.633782
CG33260,CG42507,Trl	75.6335	119.333	0.633802
Txl	78.1207	123.205	0.634071
Sema-1b	58.0452	91.4953	0.634406
CG5532	207.65	326.523	0.635943
Fps85D	19.3631	30.4468	0.635965
CG3887	102.057	160.452	0.636059
SAK	21.6565	34.0286	0.636421
CG17768,LSm-4	98.7352	155.129	0.636472
CG17508	46.6932	73.3605	0.63649
CG42394	64.024	100.484	0.637156
CG7288	21.5947	33.8864	0.637267
Jafrac2	70.9606	111.185	0.638221
mRpL18	23.4567	36.753	0.638225
Fancd2	98.1002	153.698	0.638266
CG33129	207.734	325.465	0.638268
CR18854	136.605	214.013	0.638302
CG10674	58.2976	91.3148	0.638424
Hrb87F	202.769	317.397	0.63885
pio	120.296	188.233	0.63908
l(2)05714	20.104	31.4371	0.639499
Arf102F	157.756	246.56	0.639828
wac	61.0246	95.1851	0.641115
CG17672	51.9	80.9046	0.641496
TFAM	52.9528	82.5185	0.641708
CG8223	28.9569	45.0964	0.642111
CG3038	46.488	72.3849	0.642233
schlank	21.4953	33.456	0.642495
CG34039	23.8843	37.173	0.642517
CG2852	1355.01	2107.84	0.642843
CG10038	35.8092	55.702	0.642871
CG12006	74.4668	115.823	0.642936
eIF4AIII	67.4559	104.82	0.64354
CG2034	24.3978	37.8845	0.644005
CkIIalpha	196.826	305.566	0.644136
CG9634	40.3008	62.5566	0.644229
CG17912	44.8813	69.6207	0.644655
Csat	20.1402	31.234	0.644817
twin	30.7029	47.5732	0.645382
fwe	80.4056	124.537	0.645636
Kr-h2	76.0159	117.722	0.645724
CG11137	70.5435	109.207	0.645961
CD98hc	147.011	227.512	0.646168
CG5149	32.3915	50.1061	0.646458
CG32350	27.614	42.6654	0.647222
CG5885	183.867	283.73	0.648035
CG18815	44.3402	68.4158	0.648099
CG6770	443.147	683.708	0.648152
CSN8	75.9744	117.191	0.648296
tun	26.0668	40.2052	0.648344
crim	91.5194	141.143	0.648416
SsRbeta	230.204	355.005	0.648453
Su(var)205	312.953	481.663	0.649734
me31B	180.589	277.677	0.650356
Rheb	35.4146	54.399	0.651016
SA	20.6082	31.6037	0.652082
Plod	28.4224	43.5694	0.652348
mRpS5	46.7914	71.5775	0.653717
dnk	31.028	47.4602	0.653769
p120ctn	70.4916	107.82	0.65379
sun	161.587	247	0.654198
Atox1	55.5644	84.9317	0.654225
Arf51F	63.5385	97.1125	0.654277
CG40439	90.5772	138.38	0.654554
Sip1	121.802	186.068	0.65461
CG7713	99.023	151.228	0.654793
put	36.0272	55.0106	0.654914
Dsp1	77.9514	118.98	0.655164
maf-S	53.498	81.6096	0.655536
CG34132	73.6944	112.362	0.655866
CtBP	70.5929	107.632	0.655873
CG9705	155.673	237.219	0.656242
Rhp	20.9023	31.8164	0.656966
CoVIIc	362.887	552.136	0.657242
CycA	76.8686	116.919	0.657452
RhoGAP71E	20.349	30.9379	0.657737
CG17110,CG6726	26.9126	40.8866	0.658225
CG9135	142.58	216.534	0.658465
CG8306	50.7749	77.063	0.658875
Ada2a,Rpb4	39.1344	59.3292	0.659614
CG17272	92.1244	139.646	0.6597
Srp19	76.378	115.682	0.660241
CG30428	21.0875	31.8699	0.661674
Pabp2	126.794	191.57	0.661868
smt3	735.087	1110.49	0.661948
TRAM	115.728	174.785	0.662116
CG1103	80.5719	121.517	0.66305
CG43781	249.808	376.291	0.663869
CG4293	22.9456	34.5282	0.664547
GstS1	290.13	436.42	0.664795
CG14806	26.0833	39.1851	0.665643
Gbeta13F	100.419	150.844	0.665714
E(bx)	34.7693	52.2214	0.665806
ara,caup,mirr	56.2957	84.5447	0.665869
CG13779	199.268	299.132	0.666154
Spase12	172.535	258.895	0.666428
CG9911	63.1838	94.6594	0.667486
th	143.975	215.523	0.668026
Taf10	35.7705	53.53	0.668233
dnt	21.2506	31.7984	0.668291
Nlp	424.655	635.148	0.668592
CG9992	23.1176	34.5624	0.668866
AP-2sigma	72.1421	107.828	0.669048
CG1806	22.1581	33.114	0.669146
Spc25	40.7184	60.8152	0.669543
CG31715	152.229	227.359	0.669553
CG40042	144.877	216.356	0.669623
CG7860	27.6023	41.2105	0.669788
su(Hw)	28.2536	42.1515	0.670287
Mob3	34.1676	50.9464	0.670658
sinu	106.194	158.294	0.670866
geminin	81.3223	121.217	0.670882
CycB	79.405	118.348	0.670945
mRpL52	33.6086	50.09	0.670964
CG7949	29.4614	43.9048	0.671029
Rpn5	111.395	165.947	0.671269
prtp	48.3508	71.9631	0.671883
Set	167.836	249.764	0.671978
Aos1	121.565	180.868	0.67212
HP4	76.3001	113.463	0.672467
CG1418	22.0545	32.7839	0.672724
Kal1	34.943	51.9144	0.673089
salr	22.8168	33.8957	0.673147
SmG	224.429	333.304	0.673346
not	21.5365	31.9776	0.673487
betaTub60D	95.2164	141.292	0.673898
CG3621	41.9988	62.322	0.6739
Prosbeta2	193.881	287.634	0.674055
Rpb11	99.9237	148.214	0.674185
pds5	22.0053	32.6179	0.674639
CG33977	87.161	129.094	0.675175
CG11279	25.947	38.4208	0.675337
mRpL54	20.4502	30.2765	0.675448
Krn,Ndfip	33.1332	49.0292	0.675785
Torsin	85.6302	126.709	0.675802
CG18731	23.3557	34.5539	0.675921
CR43264	62.1984	92.0073	0.676016
l(1)G0320	274.9	406.297	0.676599
CG17838	130.818	193.329	0.67666
CG1927	68.9993	101.941	0.676855
LpR2	27.8711	41.1587	0.677162
CG1240	317.299	468.363	0.677464
spin	26.2044	38.6753	0.677549
CG12107	50.7987	74.9494	0.677773
CG14609,lap	28.6896	42.3258	0.677828
Nedd8	162.518	239.761	0.677833
CG7580	197.129	290.445	0.678714
CHIP	28.2192	41.5674	0.678878
cyp33	29.3346	43.206	0.678947
CG31460	79.5392	117.061	0.679468
RpII15	63.1143	92.8399	0.679819
cg	39.2156	57.6541	0.680188
sar1	151.229	222.307	0.680271
CG7593	23.4378	34.4465	0.680412
CG7770	86.1282	126.515	0.680775
Ank	71.5053	104.893	0.681698
Rpb12	164.164	240.779	0.681804
cold	107.926	158.273	0.681898
CG15432	38.6166	56.5999	0.682273
CG5802	31.2058	45.731	0.682377
RhoGAP1A	33.1288	48.5389	0.682521
ap	74.5417	109.126	0.683079
MED31,slx1	47.7409	69.875	0.683233
Rpn9	144.067	210.839	0.683303
Prosalpha7	183.802	268.983	0.683322
Det	47.4686	69.4639	0.683356
Ubi-p5E	102.958	150.614	0.683589
CG6767	117.515	171.882	0.683696
CG3500	25.2575	36.9388	0.683766
CG11275	68.7109	100.452	0.684017
CG6766,Tom70	41.4339	60.5229	0.684599
Dref	42.0331	61.392	0.684667
roX2	33.4891	48.9124	0.684675
TfIIB	50.69	74.0051	0.684953
CG10326	50.4397	73.6387	0.684962
Tapdelta	271.764	396.711	0.685043
CG33978	43.5137	63.4729	0.685548
br	115.673	168.586	0.686136
ste24a	53.1657	77.4647	0.686322
Arf79F	456.093	664.485	0.686386
x16	95.8257	139.595	0.686455
Pros25	235.578	343.178	0.68646
tra2	31.4406	45.7939	0.686567
Ggamma1	258.691	376.557	0.68699
mura	60.6973	88.3479	0.687026
bowl	92.4702	134.554	0.687235
Aps	120.947	175.92	0.687511
CG9752	40.8019	59.3436	0.687554
borr	50.8643	73.9387	0.687925
Pros28.1	181.108	262.943	0.688773
CG32428	25.2305	36.6266	0.688857
Alg10	37.2372	54.0259	0.689247
Gas41	20.8049	30.1805	0.689349
Slip1	42.7812	62.0597	0.689356
ago	25.7278	37.3207	0.689371
CG18335,dare,fbl6	29.5957	42.907	0.689764
U2af38	54.8477	79.5034	0.689879
Spase25	168.654	244.269	0.690444
Fen1	30.7908	44.5933	0.69048
mad2	36.6572	53.0534	0.690949
CG17486	40.0477	57.9583	0.690974
CG11777	23.6846	34.2668	0.691182
Stim	44.934	64.9736	0.691573
thoc6	36.4174	52.6457	0.691745
Nup43	33.0375	47.7524	0.69185
Iswi	54.2594	78.422	0.69189
CG32230	459.618	664.079	0.692113
TH1	30.6481	44.2447	0.692695
Roc2	92.1635	132.972	0.693105
Art4	44.2958	63.9048	0.693153
CG41099	45.2346	65.2408	0.693348
fs(2)ltoPP43	31.1033	44.8514	0.693474
CG1599	45.492	65.5878	0.693605
lin-52	25.5641	36.8487	0.693759
twr	201.028	289.743	0.693815
sel	32.5515	46.912	0.693884
CG34200	225.335	324.57	0.694257
Map60	80.9005	116.508	0.694377
Spf45	43.6023	62.7913	0.6944
ox	208.62	300.351	0.694587
CG2046	43.1554	62.1303	0.694595
Rpn6	112.229	161.55	0.694701
Rip11	22.94	33.0061	0.695023
CG8289	94.1998	135.534	0.695027
CG4502	22.7281	32.6976	0.6951
CG5757	41.3836	59.5234	0.695249
CG5969,isoQC	35.3838	50.8887	0.695317
CG6422	42.62	61.2842	0.695448
CG31139,rumi	32.0552	46.0861	0.69555
Gie	28.6838	41.2079	0.696075
modSP	34.448	49.3905	0.697462
CG4164	28.9538	41.4806	0.698008
CG11138	27.1834	38.915	0.698533
tbce	23.0183	32.9032	0.699576
CG2091	35.8096	51.1873	0.69958
rtet	31.2414	44.6112	0.700304
CG9154	22.6677	32.343	0.700853
tkv	93.5	133.405	0.700873
CG4686	31.3992	44.7336	0.701915
fd68A	34.5412	49.1891	0.702212
Prosalpha5	173.555	247.098	0.702373
LBR	40.4101	57.5296	0.702423
CG14614	39.0774	55.5961	0.70288
mt:ATPase6,mt:ATPase8,mt:CoI,mt:CoII,mt:CoIII,mt:ND3	16224.4	23081.2	0.702927
CG32700	191.837	272.821	0.703161
nonA	59.946	85.2026	0.70357
dbo	22.8544	32.4809	0.703626
Prosbeta3	170.33	242.062	0.703663
CG1129	35.3863	50.2857	0.703705
aph-1	52.8265	75.0685	0.703711
CG2698	26.8342	38.1305	0.703746
CG6750	27.8889	39.6114	0.704062
CG5746	46.135	65.5048	0.7043
Cpr12A	63.1057	89.5958	0.704338
CG11455,CG3436	197.148	279.897	0.704359
c12.1	25.7239	36.5144	0.704486
Taf13	31.8769	45.1897	0.705402
CG5073	34.969	49.571	0.705433
Hrb27C	371.72	526.934	0.705439
CG18766	45.9815	65.16	0.705671
pdgy	45.828	64.828	0.706917
CG5104	45.1333	63.8416	0.706958
CG7818	23.4332	33.1409	0.707078
CG7011	22.1957	31.3847	0.707214
CG6845,p130CAS	27.4099	38.7493	0.707365
crp	39.9292	56.4476	0.707368
CG6398	109.836	155.226	0.707588
pbl	22.2068	31.3798	0.707678
l(2)s5379	57.0289	80.5376	0.708103
CG32278,CG32281	24.1393	34.086	0.708188
fax	474.382	669.68	0.708371
Tim9a	46.8584	66.1382	0.708492
CG31650	31.0111	43.7657	0.708571
Rab7	87.1797	123.029	0.708611
E2f	35.0902	49.5108	0.708738
Atx-1,CG4542,nonC	22.4977	31.7323	0.708984
CG8121	94.8155	133.701	0.709161
Oda	312.07	439.992	0.709263
Pop2	67.0307	94.427	0.709868
CG5830	28.0338	39.4893	0.709909
Taf4	27.8154	39.1626	0.710254
HP1b	60.9443	85.7292	0.710893
Hel25E	218.174	306.887	0.710926
TfIIS	58.5947	82.377	0.711299
asf1	48.7159	68.4854	0.711333
P5cr	24.9857	35.1205	0.711428
CG8331	197.001	276.878	0.711508
tho2	22.1389	31.1141	0.711539
CG34163	53.6294	75.3709	0.71154
CG4972	67.3808	94.6857	0.711626
CG33695	22.1418	31.1068	0.711799
CG18619	43.7034	61.3872	0.71193
CG5446	77.9813	109.517	0.712047
Baldspot	25.7278	36.1175	0.712336
zfh2	40.6433	57.0198	0.712793
CG5861	66.4356	93.0692	0.71383
CG17737	488.596	684.461	0.713841
Dp	74.8603	104.826	0.714139
p24-1	58.5052	81.8829	0.714498
dod	54.2808	75.9498	0.714693
CG17059	121.768	170.327	0.714907
CG3939	75.5202	105.62	0.715018
fng	83.9476	117.356	0.715324
dlg1	28.4004	39.7016	0.715346
Atf6	34.5651	48.2918	0.715755
CG4495	27.084	37.8378	0.715792
Atpalpha	107.087	149.606	0.715793
CG9797	29.5943	41.3349	0.715964
Lam	165.676	231.377	0.716044
Tango9	41.9473	58.5725	0.71616
mRpS21	76.7634	107.139	0.716484
CG32473	36.6345	51.1308	0.716486
CG42374,CG9666	27.2761	38.068	0.71651
CG11999	41.1516	57.4239	0.716628
CG5451	23.1914	32.3419	0.71707
Pcd	66.2478	92.3851	0.717083
CG3792	62.0174	86.3451	0.71825
CG14488,CG18635,CG6370	167.804	233.614	0.718296
Cyp310a1	38.6787	53.8288	0.71855
Pros35	183.076	254.525	0.719285
CG9132	33.4859	46.533	0.719616
bsk	49.1615	68.282	0.719977
Tbp-1	106.307	147.63	0.720091
d4	50.1115	69.5842	0.720156
nkd	28.7001	39.8466	0.720265
Rpb8	66.6612	92.5144	0.720549
CycG	140.145	194.356	0.721074
sax	27.6283	38.3141	0.7211
qkr58E-3	59.572	82.5656	0.721511
trsn	85.5308	118.526	0.721621
alt	77.2152	106.977	0.721793
yrt	22.542	31.2043	0.7224
Rox8	66.5694	92.1419	0.722466
unc-119	23.7797	32.9054	0.722669
ssx	36.4428	50.4141	0.722869
OstStt3	139.609	192.955	0.723531
CG3308	24.533	33.8816	0.72408
ed	84.938	117.224	0.724579
pcs	41.6141	57.4223	0.724703
ihog	64.0454	88.3678	0.724759
CG33111,eIF4G2	34.9784	48.2266	0.725293
Prx3	57.0695	78.6569	0.72555
cdi,mRpL55	51.4788	70.9288	0.725781
Sec61beta	399.793	550.77	0.72588
Arc-p34	68.5762	94.3964	0.726471
Sec61alpha	347.747	478.595	0.7266
pncr002:3R	85.5654	117.71	0.726917
HipHop	29.6791	40.8238	0.727005
fz	32.7684	45.0726	0.727014
l(1)10Bb	39.3141	54.0214	0.72775
Aut1	31.7957	43.6516	0.728397
CG5676	216.058	296.603	0.728442
Rab23	22.1243	30.3614	0.728698
CG1910	96.0783	131.839	0.728755
Pros26	176.225	241.773	0.728886
al	23.2067	31.8291	0.729103
CG1161	72.6897	99.6892	0.729163
CG4825	29.3679	40.266	0.729347
Mtch	107.654	147.599	0.729368
zetaCOP	123.364	169.129	0.729408
G-ialpha65A	95.6544	131.128	0.729473
mRpS18C	28.8437	39.5397	0.729487
CG11790	150.214	205.807	0.729878
CG2051	49.5334	67.8454	0.730092
Bub3	131.402	179.729	0.731112
CG14104	41.229	56.3788	0.731286
CG13676	48.2055	65.9119	0.731363
CG14830	24.0066	32.8233	0.731389
Sdc	72.1321	98.6174	0.731434
Mgstl	108.639	148.509	0.731531
CG17919	90.1284	123.175	0.73171
mt:Cyt-b,mt:ND6	1900.58	2596.79	0.731896
mor	62.6541	85.5979	0.731958
CG9922	61.0481	83.3734	0.732225
qkr58E-1	33.7073	46.0273	0.732333
CG17556,CG3678	39.0945	53.3785	0.732402
Rab5	94.9524	129.59	0.732714
chrb	28.6957	39.1505	0.732959
CG1440	36.7627	50.1477	0.733088
ctp	276.259	376.782	0.733206
CG42673	51.3226	69.9924	0.73326
CG3548	24.8394	33.8719	0.733334
CG6693	48.8571	66.6035	0.733552
BCL7-like	37.493	51.1091	0.733588
eff	331.673	451.93	0.733903
CG17931,CG42446	72.703	99.012	0.734285
msd1	33.7982	45.9327	0.73582
CG34159	66.4493	90.2664	0.736147
Snp	34.2719	46.5494	0.736248
exd	137.831	187.189	0.73632
CG14817	33.2566	45.1658	0.736323
CG32267	97.9463	133.011	0.736377
jagn	47.0096	63.8187	0.736612
RagA	22.9427	31.142	0.736712
Max	38.0735	51.6771	0.736758
CG5516	28.5314	38.704	0.737169
dUTPase	334.61	453.724	0.737475
flfl	36.5372	49.5398	0.737532
CG14647	28.2042	38.2271	0.737806
Catsup	81.4306	110.367	0.737817
Csp	69.1337	93.6858	0.737931
CG8478	34.1547	46.2693	0.738172
CG7655	41.6209	56.3455	0.738673
CG10777	26.1334	35.3776	0.738699
Tsp42Ee	292.792	396.098	0.739191
Zif	34.0594	46.0556	0.739528
Dredd	31.6428	42.7833	0.739606
bl	107.366	145.154	0.73967
CG11377	22.3216	30.1669	0.739937
CG5235	22.3061	30.1388	0.740112
CHOp24	86.8303	117.291	0.740298
Rpn12	126.577	170.981	0.740299
CG4452	29.0217	39.2017	0.740317
mRpL24	37.1925	50.2271	0.740487
Roc1a	234.391	316.432	0.740731
CycD	28.2003	38.0564	0.741013
MBD-like	31.3132	42.2567	0.741023
Uev1A	165.396	223.069	0.741457
RfC3	31.0368	41.8413	0.741774
m4	32.3431	43.5934	0.741927
CG7006	55.4643	74.7418	0.742079
CG14103	67.0831	90.3961	0.742102
HP1c	46.4701	62.5773	0.742603
CG34439,Nrk	152.102	204.742	0.742896
CG9422	24.3344	32.7482	0.743076
CG31121	23.1126	31.0958	0.743271
Bgb	40.5497	54.5513	0.743332
4EHP,Syx1A	29.18	39.2338	0.743746
CG16736,CG9740	44.3175	59.5829	0.743796
Sh3beta	204.033	274.313	0.743796
Ssb-c31a	136.817	183.837	0.74423
CG8321	24.4844	32.8975	0.744263
mts	258.368	347.119	0.744321
pre-mod(mdg4)-Z	30.3445	40.762	0.744431
ergic53	87.7939	117.925	0.744489
CG11376	22.4731	30.1834	0.744552
RpS15Ab	169.562	227.678	0.744745
CG6310	28.5135	38.2855	0.74476
O-fut1	133.558	179.312	0.744836
endos	170.118	228.298	0.745158
CG8003	43.1933	57.9311	0.745598
CG42239,Rab4	217.488	291.675	0.745652
mt:ND4,mt:ND4L,mt:ND5	1674.09	2244.12	0.74599
CG4968	60.7176	81.3615	0.746269
Prosbeta7	173.652	232.638	0.746447
Mob4	91.9463	123.159	0.746566
scyl	167.931	224.884	0.746745
Bet5	25.6718	34.3495	0.74737
CG43890,CG6480	29.0395	38.8334	0.747797
Cnx99A	52.7626	70.5569	0.747802
CG11486	49.5816	66.2467	0.748439
CG5390	182.373	243.607	0.748636
Cam	405.503	541.571	0.748753
Chro	51.9875	69.4229	0.748852
lwr	222.31	296.68	0.749326
tex	30.6942	40.9624	0.749326
14-3-3zeta	523.059	697.829	0.749552
Pex19	57.5627	76.7603	0.749902
Jheh2	262.514	209.795	1.25129
Mdh1	161.085	128.703	1.2516
CG15717	78.9846	63.0721	1.25229
ecd	30.9854	24.7366	1.25261
PyK	212.394	169.301	1.25453
RpL13	3541.12	2821.51	1.25504
ko	52.0038	41.4138	1.25571
r	35.2587	28.0464	1.25716
nero	38.1385	30.3265	1.2576
CG8468	68.92	54.7858	1.25799
PKD	52.1621	41.4575	1.25821
CG8939	45.235	35.9401	1.25862
CG8258	309.653	245.974	1.25889
pen	54.7075	43.4395	1.2594
CG3499	53.5756	42.5361	1.25953
CG2807	40.1745	31.8878	1.25987
Cct5	374.043	296.851	1.26004
foi	32.6371	25.8731	1.26143
gish	94.8772	75.1601	1.26233
CG7739	42.0359	33.2938	1.26257
Tpi	177.43	140.468	1.26313
Tfb1	78.0082	61.7114	1.26408
Rm62	664.698	525.725	1.26435
Nnp-1	59.0142	46.6442	1.2652
sqh	341.933	270.251	1.26524
CG10341	31.8789	25.1729	1.2664
CG10741	48.6505	38.4078	1.26668
CG30069	36.5878	28.8797	1.2669
Ipk2	31.7011	25.0139	1.26734
CG2976	44.5642	35.1477	1.26791
Haspin	82.7446	65.258	1.26796
CG11699	81.8266	64.5302	1.26804
RpL23A	2928.78	2309.67	1.26805
eIF3-S8	241.711	190.572	1.26834
shrb	133.241	105.033	1.26856
CG8549	45.6235	35.9379	1.26951
Cht2	117.174	92.2855	1.26969
Ubp64E	48.3371	38.0597	1.27003
CG31357	35.9604	28.267	1.27217
CG6259	55.7367	43.8116	1.27219
CG9782	85.4596	67.1731	1.27223
Eip55E	104.034	81.7413	1.27272
cdm	38.1336	29.9527	1.27313
Rbp1-like	90.1899	70.8234	1.27345
CG31731	52.1179	40.9103	1.27396
Rs1	40.2229	31.542	1.27522
mRpL45	40.7257	31.9248	1.27568
CG4455	246.222	192.952	1.27608
CG9086	34.5946	27.1013	1.27649
CG5525	285.764	223.411	1.2791
wus	36.9295	28.8204	1.28137
EcR	32.3729	25.2079	1.28424
RpA-70	132.97	103.522	1.28446
Ssrp	117.278	91.2518	1.28521
Pgd	58.3379	45.3787	1.28558
CG2915	109.421	85.0498	1.28655
Eap	35.1445	27.316	1.28659
RpII215	48.4124	37.6061	1.28735
CG40625	189.611	147.285	1.28737
Ef1beta	1506.54	1169.43	1.28827
CG9799	34.6854	26.8745	1.29064
l(2)09851	66.9178	51.7934	1.29201
SpdS	110.102	85.189	1.29244
ND75	62.1455	47.9719	1.29546
wdp	35.2707	27.1963	1.29689
esg	37.3167	28.7519	1.29789
CG7920	116.693	89.8556	1.29867
l(1)G0004	53.8312	41.4482	1.29876
CG17259	150.185	115.624	1.29891
RpL35A	2647.07	2037.57	1.29913
Vha100-1	36.8633	28.3702	1.29937
CG1234	38.9125	29.94	1.29968
PSR	47.1854	36.2585	1.30136
CG11784	90.5648	69.5565	1.30203
CG33170	108.687	83.4175	1.30293
beta-Spec	63.5641	48.6882	1.30553
CG2982	54.1976	41.5046	1.30582
RpL22	2680.61	2048.94	1.30829
RpS14a,RpS14b	4451.48	3401.16	1.30881
Ser	53.4507	40.6504	1.31489
l(3)72Ab	50.5861	38.3282	1.31981
Nc73EF	47.016	35.5813	1.32137
Nxf3,ssp2	42.2631	31.9818	1.32147
Ef1alpha48D	8382.52	6343.22	1.32149
Gapdh1	266.337	201.362	1.32268
mRpS22	57.7069	43.626	1.32276
btsz	35.4759	26.819	1.32279
trio	34.9554	26.4206	1.32304
Gp150	325.399	245.602	1.3249
mys	81.0926	61.2056	1.32492
IntS11	36.4964	27.5335	1.32553
sti	54.4879	41.1056	1.32556
Trxr-1	283.994	214.225	1.32568
CG34455	40.0103	30.17	1.32616
Fst	49.0072	36.9122	1.32767
SNF1A	37.3384	28.0712	1.33013
Trap1	34.9968	26.2875	1.33131
stg	68.465	51.4112	1.33171
CG33155	67.8303	50.9246	1.33198
Sam-S	289.926	217.481	1.33311
CG2811	75.4908	56.5939	1.3339
CG8891	78.7412	59.0054	1.33447
Cyt-c-p	125.534	94.0374	1.33494
Alas	33.2997	24.9308	1.33569
mib1	38.5007	28.8167	1.33606
Lst8	59.7788	44.7087	1.33707
Aats-ile	85.5336	63.9417	1.33768
Vps28	55.1463	41.2126	1.33809
CG15098	480.438	358.615	1.3397
dre4	105.131	78.4715	1.33973
Pgi	81.3083	60.6185	1.34131
CR32205,pncr009:3L	90.9117	67.7365	1.34214
Pfk	59.0279	43.9717	1.34241
CG5167	35.3342	26.2579	1.34566
Zasp52	41.2618	30.6234	1.34739
dm	55.7814	41.2856	1.35111
Dph5	123.375	91.296	1.35137
scaf	34.486	25.4618	1.35442
CG18294	94.6996	69.8432	1.35589
CG43346	36.4578	26.8506	1.3578
Hsc70-4	2311.37	1700.97	1.35885
UbcD6	138.265	101.714	1.35935
cathD	293.582	215.217	1.36412
Cda4	116.034	85.0565	1.3642
RhoGDI	357.355	261.83	1.36484
CG12299	34.736	25.4431	1.36524
CG8545	72.9075	53.3757	1.36593
CG15547,Sap-r	188.428	137.939	1.36602
Pgk	226.419	164.952	1.37264
Anxb11	110.057	80.1677	1.37283
CG8818	83.6593	60.9342	1.37294
serp	87.8658	63.973	1.37348
CG12728,CG32755,CG32756,CG6041	36.8683	26.8079	1.37528
cib	1127.38	819.594	1.37553
unc-13	37.6458	27.3624	1.37582
RpL6	2842.42	2064.83	1.37659
RpL34b	2686.81	1951.42	1.37685
CG31694	50.7504	36.7879	1.37954
Flo-1	51.9898	37.6782	1.37984
cnc	35.9746	26.0548	1.38073
Mi-2,Su(Tpl)	125.398	90.806	1.38094
CG8417	36.0451	26.0566	1.38334
CG5604	47.1632	34.0894	1.38352
TepIV	55.8097	40.2995	1.38487
Argk	730.274	527.214	1.38516
W	55.0696	39.7172	1.38654
CG10098	62.4359	44.8302	1.39272
Fas2	81.0237	58.1595	1.39313
S6k	40.7613	29.2227	1.39485
CG33138	40.6621	29.1146	1.39662
Ate1,CG9864	41.9547	30.0136	1.39786
CG14629	41.8221	29.9158	1.39799
bsf	38.3488	27.3951	1.39984
CG33054,CG33056	36.3962	25.9594	1.40204
CG9065	49.8122	35.4949	1.40336
RpL8	3921.58	2792.34	1.40441
Elp1	32.2611	22.9545	1.40544
CG7277	42.5036	30.1896	1.40789
EfTuM	103.963	73.7324	1.41
vps2	95.4357	67.6449	1.41083
CG4766	45.9047	32.5255	1.41134
Alr,CG32528	63.1551	44.7134	1.41244
CG7506	33.2928	23.532	1.41479
cer	95.9174	67.5958	1.41898
CG12081	46.3842	32.6048	1.42262
eap	14.0136	9.83784	1.42446
Aats-thr	159.479	111.877	1.42549
dome	42.6515	29.9175	1.42564
Ten-a	30.2247	21.1623	1.42823
Ald	259.233	181.14	1.43112
lost	513.498	358.729	1.43144
CG17680	61.0433	42.6111	1.43257
Ten-m	30.1053	20.9411	1.43762
CG8026	34.8824	24.264	1.43762
Map205	141.837	98.5233	1.43963
CG42813	41.0068	28.4556	1.44108
Aats-val	38.7698	26.8993	1.44129
CG8740	37.4221	25.9574	1.44167
CG9253	124.475	86.2684	1.44288
CG4061	38.4069	26.6133	1.44315
CG1703	75.8795	52.5598	1.44368
CG6294,CG6299	48.4614	33.4828	1.44735
CG1890,CG1896	185.782	128.29	1.44814
CG4025	30.2519	20.8785	1.44895
Tes	35.2151	24.2915	1.44969
Spt6	53.8916	37.1441	1.45088
l(1)G0007	34.6299	23.8398	1.45261
Aats-asp	202.053	138.897	1.4547
RpI1	35.1815	24.1748	1.4553
CG3740	31.2915	21.4902	1.45608
l(2)35Bg	56.5239	38.7985	1.45686
Pglym78	90.5822	62.0393	1.46008
CG8036	472.591	322.129	1.46709
SH3PX1	49.8895	33.9871	1.4679
por	34.29	23.296	1.47193
CG7414	298.17	201.731	1.47806
Sop2	106.443	71.9689	1.47901
CG10638	202.98	137.2	1.47945
AGO2	125.766	84.9177	1.48103
Npc2a	40.2014	27.0946	1.48374
CG8531	60.0281	40.4301	1.48474
asrij	53.2189	35.8342	1.48514
mus210	58.2721	39.1367	1.48894
CG7261	45.239	30.3029	1.49289
CG17597	43.5679	29.1053	1.49691
CG13506	31.7239	21.1486	1.50005
Uhg3,snoRNA:Me28S-C2645a,snoRNA:Me28S-C2645c	39.5572	26.3165	1.50313
CG2604	88.9039	59.1293	1.50355
CG10565	103.806	69.0013	1.50441
CG5903	127.444	84.3133	1.51155
EndoGI	115.891	76.6645	1.51166
CG34404,CG6171	64.7523	42.8206	1.51218
nocte	90.4301	59.7854	1.51258
CG15093	130.253	86.1007	1.5128
CG17904	60.9317	40.2274	1.51468
Myo31DF	31.7849	20.9805	1.51497
CG14200,Pfrx	30.315	20.0069	1.51523
Aats-glupro	90.21	59.5074	1.51595
CG42575	40.0275	26.3574	1.51864
fj	109.745	72.0797	1.52255
Ada2b	45.693	29.9823	1.524
rgn	66.6574	43.683	1.52593
Phk-3	537.697	352.029	1.52742
Ef1gamma	1994.15	1301.78	1.53186
rho-4	69.5624	45.3966	1.53233
Hmgs	46.5836	30.3241	1.53619
CG10103	62.6422	40.7743	1.53632
CG42678	48.4379	31.4474	1.54028
CG12237	64.4998	41.8226	1.54222
CG12173	101.168	65.2864	1.5496
RpL4	3209.02	2064.59	1.55431
Karybeta3	198.881	127.58	1.55887
dlp	57.0329	36.4886	1.56303
Vinc	37.2067	23.7927	1.56379
Got2	151.061	96.4074	1.5669
CG7338	56.0537	35.5684	1.57594
Uhg5,snoRNA:Me28S-C3227b,snoRNA:Me28S-G2703b	51.3102	32.5454	1.57657
Rrp4	49.0596	30.9168	1.58683
Gapdh2	813.855	510.99	1.5927
Mpcp	394.856	247.618	1.59462
Sox15	41.9615	26.303	1.59531
l(2)08717	40.3496	25.2778	1.59625
Aats-ala	182.612	114.183	1.59929
RpII140	107.101	66.9052	1.60079
CG12814	54.0471	33.545	1.61118
Spn4	57.7845	35.7835	1.61484
Ef2b	3484.05	2151.68	1.61922
wun	40.8409	25.215	1.61971
Jra	54.6284	33.5829	1.62667
dally	113.309	69.4747	1.63094
CG4364	200.158	122.686	1.63147
Pgm	40.7114	24.8982	1.63511
CG1681	39.2889	24.0132	1.63614
ref(2)P	66.0865	40.1742	1.645
Dgp-1	38.184	23.2117	1.64503
Hsp60	290.165	175.725	1.65124
babos	133.858	80.9316	1.65396
Chd64	302.168	181.749	1.66256
stc	36.1632	21.6687	1.66891
Jafrac1	451.765	270.424	1.67058
vfl	36.5125	21.771	1.67712
HBS1	35.3997	21.0486	1.68181
CG1516,cbx	56.3613	33.4312	1.68589
Aats-gln	84.0133	49.7739	1.6879
CG1550	51.0395	30.1711	1.69167
Lk6	207.263	122.217	1.69586
CG9436	52.4188	30.883	1.69734
CG5001	36.6634	21.5983	1.69751
CR42842	112.276	66.1128	1.69825
ade3	79.5295	46.8183	1.69868
zip	255.665	150.242	1.70169
CG17549	71.6245	42.0652	1.7027
CG32138,CG43986	55.3279	32.4601	1.70449
CG32212	128.111	74.7544	1.71376
obst-B	151.261	88.0616	1.71767
CG32068	47.8599	27.8289	1.71979
CG2789	218.177	126.859	1.71984
CG15353	853.016	494.397	1.72537
CG1600	111.146	63.9476	1.73808
Thor	45.176	25.972	1.73941
CG9987	63.429	36.4519	1.74007
GNBP1	78.934	45.2538	1.74425
Nmdmc	61.3032	35.0983	1.74661
ALiX	94.3014	53.8884	1.74994
Tango14	33.749	19.2035	1.75744
Eno	429.735	244.304	1.75902
CG34417	39.6705	22.5504	1.75919
PEK	47.4838	26.8192	1.77052
Cht5	41.3067	22.979	1.79758
CG17327	95.2875	52.9256	1.8004
snoRNA:Psi28S-1175a	100.272	55.5821	1.80403
Exn	32.7676	18.1483	1.80555
ab	51.1042	28.2894	1.80648
CG14291	71.7821	39.574	1.81387
CG31918	92.3935	50.8553	1.81679
pAbp	2453.04	1349.61	1.81759
CG17574	49.2864	27.1156	1.81764
CG7686	89.5688	49.2398	1.81903
Hsromega	141.983	77.8369	1.82411
kraken	31.0189	16.9627	1.82865
CG5538,desat1	338.256	184.45	1.83386
Gel	49.1746	26.7679	1.83707
MFS3	138.948	75.5087	1.84016
Wbp2	44.0009	23.9047	1.84068
eIF6	168.914	91.7151	1.84173
CG13897	55.7303	30.2249	1.84385
Hsp70Bb	5880.97	3183.27	1.84746
snoRNA:Psi18S-1377c	30.8	16.5597	1.85994
crc	1118.96	597.863	1.8716
CG42754,CG43051	87.4497	46.5862	1.87716
Brd	71.3919	37.9288	1.88226
FBX011	42.0216	22.2796	1.8861
Drip	52.8351	27.9366	1.89125
CG31549	49.5012	26.1479	1.89312
Fer1HCH	326.899	171.758	1.90325
CG3106,l(1)G0232	50.4223	26.254	1.92056
GstD3	293.94	150.452	1.95371
CG15212	38.7543	19.7981	1.95748
kay,sro	59.883	30.5634	1.9593
GstD1,GstD9	2821.22	1439.55	1.95979
CG31937	56.0914	28.5155	1.96705
ligatin	49.9764	25.327	1.97325
CG7627	36.2296	18.3412	1.97531
CG8801	437.152	220.259	1.98472
blow	98.0644	49.3381	1.9876
CG6512	71.592	35.9962	1.98888
CG33229	917.87	458.909	2.00011
CG17273	132.219	66.0683	2.00125
Fer2LCH	402.09	200.276	2.00768
mre11	60.4422	29.8177	2.02706
Wsck	38.7564	19.0427	2.03524
CG34398,Tsp29Fa	38.2713	18.7897	2.03682
Ugt86Da	64.3031	31.5264	2.03966
CG6044	60.6721	29.685	2.04386
Bin1	261.065	126.851	2.05804
CG9248	88.5842	43.0407	2.05815
Idgf4	413.05	200.507	2.06003
ps	32.7951	15.8792	2.06529
snoRNA:Psi28S-612	41.5845	20.0219	2.07695
Pcaf	44.559	21.3495	2.08712
CG4210	46.5037	22.2459	2.09044
CG14696	40.2529	19.0588	2.11204
CG10625	117.802	55.2332	2.13281
sas	112.372	52.6718	2.13344
Uhg8	44.9657	20.8804	2.15349
CG8547	51.3147	23.5244	2.18134
snoRNA:Psi18S-531	243.663	111.26	2.19003
mfas	108.371	49.1204	2.20623
Pax	71.5131	32.3647	2.2096
CG9836	140.278	63.3926	2.21285
CR41548	1249.31	558.454	2.23709
CG1648	196.653	87.8638	2.23816
CG2017	31.5469	14.0235	2.24957
CG7224	30.1169	13.1871	2.28382
CR31144	94.7399	41.0617	2.30726
Cyp28d2,Msp-300	39.4553	16.9946	2.32164
CG3168	30.5031	12.9918	2.34787
AnnX	38.063	16.1575	2.35575
CG6357	57.2047	24.1497	2.36875
trbl	60.5626	25.5061	2.37444
Jheh1	34.3307	14.41	2.38242
CG34056,CG34057	70.5308	29.3362	2.40422
CG34423,CG34424	35.3014	14.6448	2.41051
Myo61F	37.7873	15.6755	2.4106
CR40621	625.738	256.694	2.43768
CG9689	190.959	77.9086	2.45106
Adh,Adhr	174.073	70.9203	2.45449
Cg25C	34.7575	14.1589	2.45482
CG2076	172.747	69.9888	2.46821
KP78a,KP78b	50.4251	20.4182	2.46962
CG32521	55.0456	22.2698	2.47176
CG10877	35.6055	14.3266	2.48527
CG31675,CG9338	43.5647	17.4659	2.49427
CG1146	39.2259	15.711	2.49672
TepII	35.5772	14.2464	2.49728
CG9674	44.6508	17.8776	2.49758
CG32795,w	382.966	153.267	2.49869
CG10249	47.1931	18.7284	2.51987
Gdh	326.461	127.578	2.55891
CG12264	68.9641	26.7054	2.5824
CR40677	420.363	162.615	2.58502
CR40734	642.26	248.253	2.58712
CG5210	74.0483	28.6151	2.58774
CR41583	405.028	156.453	2.58882
Uhg1	131.248	50.5412	2.59685
CG4199	156.613	59.52	2.63127
Cpr51A	78.1161	29.5253	2.64573
sda	55.3756	20.9258	2.64628
cher	86.1568	32.426	2.65703
CG1572	194.861	73.1653	2.6633
Spn6	52.8587	19.7661	2.67421
Src64B	165.897	61.9698	2.67706
CG18547	116.802	43.2933	2.69792
cv-2	33.8497	12.4117	2.72724
CG4096	52.4246	19.1992	2.73056
CR40668	99.4018	36.3669	2.7333
CG34449	30.1041	10.9587	2.74705
CR41602	117.607	42.2484	2.7837
CG13044	167.088	59.9397	2.7876
CR40546	1515.55	539.403	2.80968
CR41544	207.104	73.2217	2.82845
Cul-2	123.489	43.4864	2.83972
SP1173	95.4946	33.4622	2.85381
Obp99b	707.105	245.897	2.87561
CR41540	1479.34	509.65	2.90266
CG6272	71.0832	24.2342	2.93318
CG9691	269.708	91.7824	2.93856
CR41535	983.543	331.881	2.96354
Ag5r	33.4681	11.1027	3.01441
CR40779	1659.76	549.4	3.02104
CG10916	36.7173	12.0338	3.05118
sra	32.768	10.7179	3.05732
CG43236	54.129	17.6694	3.06343
GlyP	117.334	38.2529	3.06732
agt	41.6537	13.5588	3.07208
CG31705	51.1973	16.6238	3.07976
Cyp9c1	33.1514	10.7456	3.08511
CR41609	1213.84	391.62	3.09954
CG9527	38.8807	12.2838	3.1652
vir-1	68.0659	21.3752	3.18434
CG12171	117.428	36.6749	3.20186
CG9336	64.0794	19.7872	3.23843
CHKov2	45.3508	13.9481	3.2514
CG5961	54.3438	16.3597	3.32181
pst	68.2099	20.4943	3.32824
CG2064	34.3948	10.324	3.33154
Gpdh	54.7536	16.1599	3.38824
CG11370	50.6895	14.9549	3.38949
fru	82.51	24.0723	3.42759
Dif,dl	57.597	16.7991	3.42858
Socs36E	50.9944	14.6316	3.48522
CG31728	44.45	12.7484	3.48671
Clect27	44.5291	12.7245	3.49948
CG12268	64.3154	18.2652	3.5212
Cpr64Aa	294.176	83.4822	3.52382
CR41617	300.793	85.0677	3.53592
ver	31.1175	8.63645	3.60304
asparagine-synthetase	40.9086	11.0993	3.68569
CG16704	109.391	29.4953	3.70876
CG3835	32.8412	8.8236	3.72197
CG3788	30.1609	7.93816	3.79948
CG15611	42.8513	10.9652	3.90794
GstE1	112.402	28.5307	3.93969
Spn47C	31.629	7.89295	4.00725
Lsp1alpha	226.176	55.3445	4.08669
CG3008	120.761	28.7149	4.20552
ImpL2	80.248	18.791	4.27056
CG14566	42.9891	9.79991	4.38668
Mmp1	75.0441	16.8981	4.44098
MRP	97.0814	21.4732	4.52105
CG10126	37.2002	8.13984	4.57014
LamC	78.0349	16.8366	4.63484
TwdlE	46.2389	9.81076	4.71308
CR40712	147.539	31.0272	4.75515
CG14567	44.4895	9.19482	4.83854
CG10527	211.078	43.4755	4.8551
Cyp6a17,Cyp6a23	33.4038	6.87126	4.86138
Fbp2	443.067	87.7104	5.05148
Gadd45	56.5798	10.6918	5.29189
CG43325,CG43326	88.9418	16.5241	5.38255
amd	42.5959	7.87269	5.41059
Xrp1	557.91	102.829	5.42561
Pepck	232.976	41.6653	5.59161
snoRNA:Psi28S-2562	100.796	17.94	5.61851
Obp99c	82.3012	14.1666	5.80952
Rfabg	33.4978	5.72779	5.84829
Drs	40.0285	6.7747	5.90853
Ugt86Di	239.475	40.1861	5.95915
CG14907	47.1982	7.71685	6.11625
Men	85.6901	13.3527	6.41744
Cys	44.5917	6.6424	6.71319
snRNA:U2:34ABa	31.1844	4.60037	6.77867
CG2233	54.4403	7.92208	6.87197
glob1	46.2299	6.71712	6.8824
Lsp2	753.194	107.37	7.01494
CG30196	55.2731	7.62572	7.24825
CG34166	872.283	118.35	7.37037
CG43144	125.444	16.5136	7.59641
Nplp4	73.6145	9.04262	8.14084
Tsf1	35.7081	4.19104	8.5201
GstE5	69.148	7.86219	8.795
Arc2	37.0641	4.12404	8.98733
CG5399	168.062	17.383	9.66818
Aldh	135.279	13.9752	9.67993
fon	51.3655	4.99992	10.2733
ImpL3	74.6117	7.11526	10.4862
snoRNA:Psi18S-1854c	88.6327	8.23384	10.7644
Lsp1gamma	1238.97	110.755	11.1866
AcCoAS	36.5897	3.16154	11.5734
TotA	197.588	16.723	11.8153
GstE3	33.4317	2.80553	11.9164
CG12947	40.4111	3.32102	12.1683
Tsp29Fb	47.5712	3.75834	12.6575
CG6330	41.4028	3.16708	13.0729
CG13321	32.6282	2.25085	14.4959
Npc2g,Npc2h	43.9078	3.00954	14.5895
CG7054,Pebp1	327.604	21.6887	15.1048
Nplp2	240.842	15.335	15.7054
CG34232	36.8298	2.33789	15.7534
CG13315	117.001	7.00038	16.7135
CG6188	35.4841	2.04503	17.3514
CG13067	32.0519	1.6673	19.2238
CG34291	218.612	10.5398	20.7416
Lsp1beta	1390.08	66.9322	20.7685
CG16712	80.8545	3.55237	22.7607
Cyp6d2	52.1539	1.99055	26.2007
CR40469	4226.84	122.254	34.5742
CG7916	44.9489	1.24528	36.0954
CG15199,CG32667	40.1495	0.713327	56.2848
CG4716	31.3592	0.504947	62.1039
GstE6	134.493	1.85954	72.326
Ucp4B	121.236	1.53538	78.9616
CG13323	209.304	2.35246	88.9724
CG15784	1127.14	10.1105	111.482
CG34330	77.3386	0.612442	126.279
CG8952	79.7925	0.576788	138.339
CG33306,CG8997	271.638	1.81141	149.959
mex1	33.8178	0.199284	169.697
Cyp4e3	61.636	0.358958	171.708
Arc1	788.796	4.51202	174.821
obst-F	39.7437	0.21009	189.175
CG15043	190.422	0.884217	215.357
betaTry	51.3489	0.202804	253.195
CG31086,CG31323	48.738	0.174845	278.75
Phae1	67.3958	0.239748	281.111
CG18179	33.3639	0.0974646	342.318
PGRP-SC2	43.6622	0.117672	371.05
CG7953	260.794	0.551981	472.469
CG3868	141.195	0.288073	490.136
epsilonTry	518.682	1.05369	492.253
Dbi	111.285	0.219469	507.065
m1	243.607	0.434309	560.907
CG18180	97.0529	0.170521	569.155
CG7567	258.987	0.450474	574.921
mag	177.387	0.242431	731.701
CG8664	171.1	0.216913	788.796
CG4734	119.207	0.140284	849.755
CG14302	2961.29	3.48018	850.901
CG12115	125.54	0.130718	960.388
LysB	7292.27	7.0774	1030.36
CG10910	66.571	0.0610218	1090.94
deltaTry	292.315	0.260292	1123.03
CG8629	336.365	0.296657	1133.85
LysD	7971.58	6.85778	1162.41
CG8661	153.032	0.130926	1168.84
thetaTry	183.07	0.155049	1180.72
Jon25Bii	1137.76	0.931014	1222.07
CG7298	102.365	0.0765772	1336.76
CG32302	303.691	0.193652	1568.23
Jon74E	851.267	0.51922	1639.51
Jon65Aiii	4146.89	2.51656	1647.84
Jon65Aiv	8256.77	4.60334	1793.65
CG6296	83.2941	0.0422898	1969.6
CG6933	384.5	0.17625	2181.56
LysC	952.514	0.419176	2272.35
Bace	54.2104	0.0236181	2295.29
CG15829	152.021	0.0645002	2356.91
LysS	2835.54	1.19712	2368.63
Muc18B	94.1757	0.0392214	2401.13
Phae2	75.8086	0.0315365	2403.84
yip7	3784.49	1.52581	2480.32
CG17145	102.738	0.0391695	2622.91
CG12934	381.354	0.108912	3501.49
CG3819	198.963	0.0510697	3895.91
CG4830	50.3159	0.0115914	4340.8
CG10912	150.474	0.0338761	4441.89
CG7715	154.276	0.0300555	5133.04
LysE	363.56	0.0691183	5259.97
Peritrophin-15a	1414.21	0.268737	5262.43
Ag5r2	164.349	0.0303607	5413.22
Jon25Bi	369.471	0.0566337	6523.87
CG31789	1605.17	0.23628	6793.51
Muc96D	104.929	0.0151003	6948.8
CG7290	154.113	0.0189208	8145.16
CG43896	49.176	0.00549321	8952.14
CG6839	323.87	0.0346031	9359.57
CG34282	993.565	0.0858737	11570.1
alphaTry	575.738	0.0358222	16072.1
Muc55B	436.512	0.0163159	26753.8
Cda9	46.2088	0	NA
CG10154	57.1022	0	NA
CG10182	21.6396	0	NA
CG10725	256.556	0	NA
CG11672	14.7285	0	NA
CG13324	20.2836	0	NA
CG13806	11.3969	0	NA
CG14205	15.096	0	NA
CG14300	814.007	0	NA
CG14989	14.556	0	NA
CG15068	45.0889	0	NA
CG15126	31.6962	0	NA
CG15534	10.2291	0	NA
CG17826	100.013	0	NA
CG30025	137.861	0	NA
CG31464	10.9089	0	NA
CG34026	87.1966	0	NA
CG34176	11.1183	0	NA
CG42728	11.9971	0	NA
CG43349	13.6554	0	NA
CG43351	24.7686	0	NA
CG4363	25.2608	0	NA
CG4377	16.3599	0	NA
CG4835	11.3469	0	NA
CG5084	424.269	0	NA
CG5246	37.4608	0	NA
CG5506	128.001	0	NA
CG5883	17.3168	0	NA
CG6271	19.567	0	NA
CG6403	146.491	0	NA
CG7017	85.4029	0	NA
CG7248	12.0392	0	NA
CG7252	32.417	0	NA
CG7714	136.946	0	NA
CG9673	11.2808	0	NA
Cpr47Ec	14.6289	0	NA
IM2	19.0371	0	NA
IM3	49.517	0	NA
Muc26B	23.7886	0	NA
Npc2d	19.2399	0	NA
Peritrophin-15b	1109.59	0	NA
snoRNA:229	16.4317	0	NA
snoRNA:Or-aca1	77.7705	0	NA
snoRNA:Psi28S-1135f	12.9093	0	NA
snoRNA:Psi28S-1175b	18.3697	0	NA
snoRNA:Psi28S-1175c	31.8904	0	NA
snoRNA:Psi28S-2444	118.616	0	NA
snoRNA:Psi28S-2996	31.1356	0	NA
snoRNA:Psi28S-3327a	29.7488	0	NA
TotC	11.7559	0	NA
sens	0.597536	3.09141	0.193289
NA indicates not available.
