# Supplementary material for: The exon junction complex regulates the splicing of cell polarity gene dlg1 to control Wingless signaling in development
Source: eLife. 2016 Aug 18;5:e17200. doi: 10.7554/eLife.17200 (PMC5008907; doi:10.7554/eLife.17200)
Supplement: Supplementary file 3. — 408 novel transcripts in 227 genes were identified by Cufflinks (v2.2.1). DOI: http://dx.doi.org/10.7554/eLife.17200.030 [file elife-17200-supp3.xlsx]

## Sheet: Transcirps of ST1 genes
Supplementary file 3. Bioinformatic analyses deduce novel transcripts from the pre-EJC regulated candidate genes.
transcirpt.ID	gene.ID	gene.name	class.code	tsu.FPKM-1	tsu.FPKM-2
TCONS_00001444	XLOC_000778	ab	=	26.5389	31.8746
TCONS_00001710	XLOC_000921	CG31731	j	13.116	22.1619
TCONS_00001823	XLOC_000991	stc	=	9.89343	12.0149
TCONS_00003920	XLOC_002131	Npc1a	j	6.70321	5.32493
TCONS_00005146	XLOC_002839	CG40439	=	17.5759	35.0169
TCONS_00005201	XLOC_002960	lt	i	2.01007	1.66757
TCONS_00005206	XLOC_002969	Spf45	p	1.08821	0.740182
TCONS_00005989	XLOC_002992	CG17082	c	8.63535	10.6964
TCONS_00008752	XLOC_004517	CG12547	=	4.4771	5.90241
TCONS_00008779	XLOC_004530	CG30440	=	4.95166	4.99121
TCONS_00009079	XLOC_004650	CG1600	i	0.98939	1.65049
TCONS_00009603	XLOC_004894	Spn47C	=	24.9336	12.0643
TCONS_00011266	XLOC_005811	qkr58E-1	j	10.2516	14.557
TCONS_00011613	XLOC_006013	Mmp1	j	29.7776	22.3252
TCONS_00011703	XLOC_006064	Stlk	p	0.786768	1.49047
TCONS_00011704	XLOC_006065	Stlk	p	0.857956	0.902668
TCONS_00011724	XLOC_006095	sxc	i	8.40094	10.3404
TCONS_00011726	XLOC_006097	sxc	i	1.23286	2.06312
TCONS_00012669	XLOC_006243	rl	.	8.39544	6.61178
TCONS_00012692	XLOC_006255	Haspin	=	54.4604	72.357
TCONS_00015238	XLOC_007556	Uhg8	e	19.5555	23.5909
TCONS_00015609	XLOC_007733	CG17698	j	3.44761	4.936
TCONS_00017046	XLOC_008423	CG6310	=	24.2214	19.3556
TCONS_00017414	XLOC_008623	CG3868	=	62.8281	71.9225
TCONS_00018365	XLOC_009121	CG32447	c	2.06875	3.30849
TCONS_00018497	XLOC_009258	ver	i	9.5257	6.8757
TCONS_00020480	XLOC_009988	CG11686	=	6.2828	9.8169
TCONS_00020494	XLOC_009994	CG32473	=	10.4419	4.45235
TCONS_00020850	XLOC_010162	sra	e	114.854	114.002
TCONS_00021321	XLOC_010423	cdc2c	j	10.355	13.6292
TCONS_00021358	XLOC_010443	CG5630	=	11.8436	6.13069
TCONS_00021365	XLOC_010444	Atpalpha	=	14.3629	15.5085
TCONS_00022016	XLOC_010787	jigr1	j	11.8988	21.9183
TCONS_00022173	XLOC_010878	CG14257	j	0.896729	0.787742
TCONS_00022511	XLOC_011062	Bet5	=	15.938	26.2409
TCONS_00023079	XLOC_011338	Ref1	=	35.2455	38.4881
TCONS_00023116	XLOC_011355	rn	j	5.90256	5.94247
TCONS_00023440	XLOC_011519	Fst	=	14.5918	14.599
TCONS_00024711	XLOC_012202	CG17271	=	4.27615	5.55905
TCONS_00024712	XLOC_012202	CG17271	=	6.72067	8.42762
TCONS_00024806	XLOC_012250	E2f	j	3.71673	6.535
TCONS_00025072	XLOC_012411	Pli	=	3.88797	4.18938
TCONS_00025170	XLOC_012451	CG5746	j	5.65757	5.95302
TCONS_00025308	XLOC_012535	CHKov2	=	12.9955	14.1018
TCONS_00025689	XLOC_012746	SP1029	=	2.98008	1.79061
TCONS_00026022	XLOC_012917	Map205	=	37.3634	45.6739
TCONS_00026061	XLOC_013006	sra	i	93.4679	103.974
TCONS_00026062	XLOC_013007	sra	i	112.803	118.733
TCONS_00027268	XLOC_013149	CG32000	j	15.0019	15.3849
TCONS_00027442	XLOC_013206	CG2219	j	8.93531	10.5461
TCONS_00027600	XLOC_013243	pho	j	2.49128	3.44055
TCONS_00027603	XLOC_013243	pho	=	4.71256	6.40835
TCONS_00027612	XLOC_013250	CG2316	i	3.22795	6.92209
TCONS_00027620	XLOC_013263	Eph	i	7.34518	11.0044
TCONS_00030846	XLOC_014841	Fas2	e	8.2144	7.78268
TCONS_00031079	XLOC_014981	shf	c	5.88088	6.16707
TCONS_00031080	XLOC_014981	shf	c	4.8598	5.08264
TCONS_00031141	XLOC_015000	unc-119	=	9.36172	13.3626
TCONS_00031376	XLOC_015125	CG34449	=	16.7517	10.9696
TCONS_00031388	XLOC_015129	CG32700	c	165.441	164.315
TCONS_00000651	XLOC_000360	Lam	=	44.99	NA
TCONS_00001163	XLOC_000621	Aldh	=	35.7787	NA
TCONS_00001268	XLOC_000683	Pros35	=	27.1712	NA
TCONS_00001440	XLOC_000778	ab	j	17.8073	NA
TCONS_00001450	XLOC_000779	CG33695	j	5.66672	NA
TCONS_00001949	XLOC_001077	CG17912	=	5.55544	NA
TCONS_00001982	XLOC_001085	mdy	j	3.89879	NA
TCONS_00002507	XLOC_001419	Cul-2	j	54.2936	NA
TCONS_00002674	XLOC_001484	Ent1	j	4.48387	NA
TCONS_00002830	XLOC_001582	tho2	j	9.90111	NA
TCONS_00003812	XLOC_002072	borr	=	10.04	NA
TCONS_00003938	XLOC_002135	bsk	=	9.88046	NA
TCONS_00003940	XLOC_002137	Pten	j	7.13531	NA
TCONS_00003948	XLOC_002137	Pten	j	2.59007	NA
TCONS_00003957	XLOC_002141	CG5604	j	10.3199	NA
TCONS_00004005	XLOC_002170	Myo31DF	=	5.18928	NA
TCONS_00004322	XLOC_002351	CG9008	=	2.43112	NA
TCONS_00004357	XLOC_002379	smi35A	j	2.48162	NA
TCONS_00004514	XLOC_002475	CG5861	=	6.601	NA
TCONS_00005202	XLOC_002961	lt	i	1.45939	NA
TCONS_00005203	XLOC_002962	lt	i	0.640302	NA
TCONS_00005204	XLOC_002966	Cht3	p	0.80524	NA
TCONS_00005972	XLOC_002986	Stlk	c	6.29294	NA
TCONS_00005982	XLOC_002992	CG17082	j	4.55135	NA
TCONS_00006323	XLOC_003162	Pabp2	j	165.869	NA
TCONS_00006958	XLOC_003501	fra	=	2.27466	NA
TCONS_00007036	XLOC_003541	Aats-val	=	18.3076	NA
TCONS_00007357	XLOC_003717	tun	=	3.12534	NA
TCONS_00007358	XLOC_003717	tun	j	5.06718	NA
TCONS_00008252	XLOC_004226	Snp	j	4.27811	NA
TCONS_00008729	XLOC_004503	CG30428	=	11.6239	NA
TCONS_00008736	XLOC_004507	Gprk1	=	10.2309	NA
TCONS_00008737	XLOC_004508	Gprk1	e	7.33184	NA
TCONS_00008738	XLOC_004508	Gprk1	=	4.2598	NA
TCONS_00008742	XLOC_004512	Stlk	c	3.50882	NA
TCONS_00008781	XLOC_004530	CG30440	=	5.38413	NA
TCONS_00008835	XLOC_004555	EcR	=	8.31646	NA
TCONS_00009302	XLOC_004767	PO45	j	2.38265	NA
TCONS_00009409	XLOC_004813	CG1648	=	55.3035	NA
TCONS_00009604	XLOC_004894	Spn47C	j	6.19607	NA
TCONS_00010142	XLOC_005154	tra2	=	10.1975	NA
TCONS_00010299	XLOC_005236	Zasp52	=	10.1523	NA
TCONS_00010300	XLOC_005236	Zasp52	=	26.1018	NA
TCONS_00010750	XLOC_005460	l(2)08717	j	4.66033	NA
TCONS_00011671	XLOC_006042	zip	j	128.381	NA
TCONS_00011707	XLOC_006068	p120ctn	p	1.20985	NA
TCONS_00011718	XLOC_006081	CG12547	p	1.22171	NA
TCONS_00011725	XLOC_006096	sxc	i	1.08012	NA
TCONS_00011729	XLOC_006100	CG30440	p	0.806637	NA
TCONS_00011750	XLOC_006160	Cpr49Ac	i	14.9633	NA
TCONS_00011758	XLOC_006177	CG10249	i	5.88827	NA
TCONS_00011762	XLOC_006196	fj	p	0.563442	NA
TCONS_00011769	XLOC_006214	CG13506	i	6.53922	NA
TCONS_00011770	XLOC_006215	CG13506	i	3.6941	NA
TCONS_00012676	XLOC_006246	CG40191	j	5.84918	NA
TCONS_00012706	XLOC_006263	MFS17	=	9.38048	NA
TCONS_00012714	XLOC_006265	CG41378	=	19.2905	NA
TCONS_00012722	XLOC_006271	uex	e	2.41338	NA
TCONS_00012730	XLOC_006300	MFS17	i	2.12192	NA
TCONS_00012731	XLOC_006301	MFS17	i	3.85556	NA
TCONS_00012732	XLOC_006303	MFS17	i	2.24626	NA
TCONS_00012733	XLOC_006303	MFS17	i	4.3757	NA
TCONS_00012734	XLOC_006304	CG41378	p	1.87115	NA
TCONS_00012735	XLOC_006306	uex	p	1.65738	NA
TCONS_00012737	XLOC_006312	uex	i	3.02465	NA
TCONS_00013155	XLOC_006469	CG1146	e	5.44433	NA
TCONS_00013537	XLOC_006658	Ubp64E	=	38.1179	NA
TCONS_00013881	XLOC_006823	foi	=	5.81431	NA
TCONS_00014317	XLOC_007041	CG17826	=	35.8162	NA
TCONS_00014592	XLOC_007183	CG34039	=	4.07298	NA
TCONS_00014602	XLOC_007187	dlp	j	13.8133	NA
TCONS_00014773	XLOC_007280	Taf4	=	12.6914	NA
TCONS_00015354	XLOC_007610	CG7338	j	30.4682	NA
TCONS_00015451	XLOC_007659	mub	=	6.20087	NA
TCONS_00015607	XLOC_007731	CG17454	=	7.78924	NA
TCONS_00015610	XLOC_007733	CG17698	=	2.51144	NA
TCONS_00015621	XLOC_007736	CG40045	i	27.8253	NA
TCONS_00015790	XLOC_007811	trio	=	9.74695	NA
TCONS_00015804	XLOC_007818	LysD	=	3691.93	NA
TCONS_00016153	XLOC_007970	CG32267	=	14.2435	NA
TCONS_00016243	XLOC_008011	Cpr64Aa	=	54.8623	NA
TCONS_00016375	XLOC_008075	Uev1A	=	84.3621	NA
TCONS_00016384	XLOC_008082	CG10625	=	43.8742	NA
TCONS_00016386	XLOC_008082	CG10625	=	49.0276	NA
TCONS_00016500	XLOC_008159	SP1173	=	15.7733	NA
TCONS_00016658	XLOC_008230	pbl	j	3.27203	NA
TCONS_00017419	XLOC_008625	bbg	=	11.3591	NA
TCONS_00017789	XLOC_008818	CG6479	c	1.04095	NA
TCONS_00017790	XLOC_008818	CG6479	j	2.44838	NA
TCONS_00018273	XLOC_009077	ko	=	9.49306	NA
TCONS_00018469	XLOC_009183	E(bx)	i	4.86146	NA
TCONS_00018470	XLOC_009183	E(bx)	i	4.33038	NA
TCONS_00018480	XLOC_009209	SP1173	i	5.97943	NA
TCONS_00018508	XLOC_009289	Eip75B	i	1.16461	NA
TCONS_00019401	XLOC_009399	vtd	p	1.69007	NA
TCONS_00020075	XLOC_009736	ps	j	4.75035	NA
TCONS_00020387	XLOC_009932	CG5167	=	7.48882	NA
TCONS_00020411	XLOC_009947	Hsp70Bb	=	7404.75	NA
TCONS_00020773	XLOC_010132	Acyp2	j	5.61445	NA
TCONS_00020859	XLOC_010168	gish	=	30.3182	NA
TCONS_00021331	XLOC_010426	CG17838	c	2.04748	NA
TCONS_00021332	XLOC_010426	CG17838	=	63.6547	NA
TCONS_00021359	XLOC_010443	CG5630	j	12.5537	NA
TCONS_00022012	XLOC_010787	jigr1	=	12.6485	NA
TCONS_00022040	XLOC_010802	Sppl	i	3.98921	NA
TCONS_00022937	XLOC_011267	Rab23	=	1.73258	NA
TCONS_00022938	XLOC_011267	Rab23	=	1.96233	NA
TCONS_00022967	XLOC_011279	CG2017	=	6.54166	NA
TCONS_00023410	XLOC_011506	mura	=	9.87259	NA
TCONS_00023411	XLOC_011506	mura	=	6.21072	NA
TCONS_00023544	XLOC_011567	CG12814	=	8.96382	NA
TCONS_00023545	XLOC_011567	CG12814	=	9.6808	NA
TCONS_00024493	XLOC_012080	fru	j	13.6251	NA
TCONS_00024506	XLOC_012080	fru	j	33.8137	NA
TCONS_00024522	XLOC_012090	CG14300	=	319.541	NA
TCONS_00024730	XLOC_012214	CG17278	j	64.198	NA
TCONS_00025024	XLOC_012385	CG10182	j	5.09502	NA
TCONS_00025306	XLOC_012535	CHKov2	j	7.13434	NA
TCONS_00025307	XLOC_012535	CHKov2	=	5.65193	NA
TCONS_00025515	XLOC_012644	Ser	=	7.33987	NA
TCONS_00025516	XLOC_012644	Ser	=	10.4891	NA
TCONS_00025592	XLOC_012681	ALiX	=	22.1619	NA
TCONS_00026039	XLOC_012972	hth	i	10.1125	NA
TCONS_00026040	XLOC_012973	hth	i	17.731	NA
TCONS_00026041	XLOC_012973	hth	i	36.0493	NA
TCONS_00026042	XLOC_012974	hth	i	65.9022	NA
TCONS_00026043	XLOC_012975	hth	i	37.889	NA
TCONS_00026049	XLOC_012985	CG32473	i	2.06124	NA
TCONS_00026050	XLOC_012986	CG32473	i	1.81795	NA
TCONS_00026063	XLOC_013009	sra	i	0.42381	NA
TCONS_00026097	XLOC_013082	CG42813	p	1.0547	NA
TCONS_00027210	XLOC_013127	Alg-2	j	35.9327	NA
TCONS_00027212	XLOC_013127	Alg-2	=	62.7718	NA
TCONS_00027221	XLOC_013141	CG41128	p	0.742936	NA
TCONS_00027328	XLOC_013162	zfh2	=	4.27109	NA
TCONS_00027329	XLOC_013162	zfh2	=	7.68524	NA
TCONS_00027359	XLOC_013171	CG11360	=	8.42563	NA
TCONS_00027387	XLOC_013184	Rfabg	j	3.24878	NA
TCONS_00027432	XLOC_013202	Ank	j	9.55807	NA
TCONS_00027446	XLOC_013208	CG2316	=	14.3765	NA
TCONS_00027447	XLOC_013208	CG2316	j	6.06028	NA
TCONS_00027477	XLOC_013214	CG2177	j	16.3647	NA
TCONS_00027486	XLOC_013215	PMCA	=	25.0001	NA
TCONS_00027487	XLOC_013215	PMCA	j	10.4548	NA
TCONS_00027541	XLOC_013231	unc-13	j	18.7685	NA
TCONS_00027543	XLOC_013231	unc-13	=	15.6993	NA
TCONS_00027594	XLOC_013241	cals	j	13.4384	NA
TCONS_00027611	XLOC_013249	CG2316	i	9.53196	NA
TCONS_00027613	XLOC_013251	CG2316	i	2.87225	NA
TCONS_00027614	XLOC_013252	CG2316	i	4.87168	NA
TCONS_00027615	XLOC_013252	CG2316	i	3.14165	NA
TCONS_00027617	XLOC_013258	bip2	p	0.701584	NA
TCONS_00027618	XLOC_013261	Eph	i	55.4925	NA
TCONS_00027619	XLOC_013262	Eph	i	5.26542	NA
TCONS_00027623	XLOC_013272	CaMKII	i	6.73287	NA
TCONS_00027624	XLOC_013273	CaMKII	i	3.86476	NA
TCONS_00027625	XLOC_013274	cals	i	5.09242	NA
TCONS_00027743	XLOC_013283	CG17691	=	7.91179	NA
TCONS_00027744	XLOC_013283	CG17691	=	4.53542	NA
TCONS_00027770	XLOC_013301	CG40625	=	419.323	NA
TCONS_00027927	XLOC_013463	CR41583	p	1.94347	NA
TCONS_00028655	XLOC_013793	CG15784	j	206.325	NA
TCONS_00028656	XLOC_013793	CG15784	=	224.968	NA
TCONS_00028765	XLOC_013857	CG34417	j	5.65112	NA
TCONS_00028801	XLOC_013869	CG3168	c	2.76059	NA
TCONS_00029211	XLOC_014077	CG2076	=	24.3979	NA
TCONS_00029295	XLOC_014115	roX2	=	4.37029	NA
TCONS_00029382	XLOC_014156	Ten-a	j	11.0926	NA
TCONS_00029825	XLOC_014363	exd	=	17.9623	NA
TCONS_00030016	XLOC_014451	CG6398	=	15.8132	NA
TCONS_00030671	XLOC_014758	Vinc	=	6.769	NA
TCONS_00031375	XLOC_015125	CG34449	=	8.38506	NA
TCONS_00031598	XLOC_015216	l(1)10Bb	=	13.3352	NA
TCONS_00031737	XLOC_015279	CG11138	=	7.62791	NA
TCONS_00031822	XLOC_015317	Yippee	c	9.07204	NA
TCONS_00032102	XLOC_015460	CycD	=	3.6787	NA
TCONS_00032194	XLOC_015488	CG9992	=	3.06213	NA
TCONS_00032196	XLOC_015489	TH1	=	9.58704	NA
TCONS_00032304	XLOC_015519	CG9634	=	4.60051	NA
TCONS_00032910	XLOC_015840	br	i	14.7713	NA
TCONS_00032911	XLOC_015841	br	i	12.4507	NA
TCONS_00032914	XLOC_015843	br	i	222.043	NA
TCONS_00032973	XLOC_015983	dlg1	i	2.84849	NA
TCONS_00032974	XLOC_015984	CkIIbeta	i	2.97653	NA
TCONS_00005233	XLOC_000398	CG9135	=	NA	18.0412
TCONS_00005261	XLOC_000683	Pros35	=	NA	29.9025
TCONS_00005263	XLOC_000698	GATAd	c	NA	4.01429
TCONS_00005270	XLOC_000778	ab	i	NA	19.3933
TCONS_00005271	XLOC_000779	CG33695	j	NA	4.54097
TCONS_00005278	XLOC_000854	MRP	=	NA	52.876
TCONS_00005283	XLOC_000921	CG31731	=	NA	12.0145
TCONS_00005284	XLOC_000921	CG31731	=	NA	13.3369
TCONS_00005302	XLOC_001149	Fas3	=	NA	19.9046
TCONS_00005318	XLOC_001331	Hr39	j	NA	10.758
TCONS_00005321	XLOC_001419	CG43144	e	NA	59.1651
TCONS_00005332	XLOC_001451	lt	j	NA	3.07063
TCONS_00005333	XLOC_001451	lt	e	NA	1.22231
TCONS_00005346	XLOC_001582	tho2	=	NA	8.65852
TCONS_00005376	XLOC_001804	Hel25E	=	NA	17.7403
TCONS_00005396	XLOC_002072	borr	=	NA	10.0975
TCONS_00005404	XLOC_002135	bsk	=	NA	6.40816
TCONS_00005430	XLOC_002351	CG9008	=	NA	2.56427
TCONS_00005436	XLOC_002379	smi35A	j	NA	4.33848
TCONS_00005437	XLOC_002379	smi35A	j	NA	2.41775
TCONS_00005521	XLOC_002942	Df31	i	NA	12.2687
TCONS_00005525	XLOC_002964	cta	i	NA	3.74567
TCONS_00005526	XLOC_002964	cta	i	NA	4.59156
TCONS_00005527	XLOC_002964	cta	i	NA	5.34618
TCONS_00005528	XLOC_002964	cta	i	NA	7.76695
TCONS_00005529	XLOC_002965	cta	p	NA	1.25568
TCONS_00011786	XLOC_002990	CG17883	=	NA	6.83226
TCONS_00011787	XLOC_002992	CG17082	j	NA	7.57326
TCONS_00011791	XLOC_003000	d4	j	NA	9.20756
TCONS_00011815	XLOC_003162	Pabp2	j	NA	186.34
TCONS_00011852	XLOC_003501	fra	=	NA	3.10805
TCONS_00011861	XLOC_003614	CG8531	j	NA	6.94212
TCONS_00011930	XLOC_004467	Cyp9c1	=	NA	3.8378
TCONS_00011934	XLOC_004508	Gprk1	e	NA	4.86918
TCONS_00011935	XLOC_004512	Stlk	=	NA	2.88585
TCONS_00011939	XLOC_004523	gus	=	NA	13.7019
TCONS_00011947	XLOC_004600	Spn4	j	NA	11.9061
TCONS_00011965	XLOC_004781	CG8026	=	NA	4.05007
TCONS_00012014	XLOC_005236	Zasp52	=	NA	13.638
TCONS_00012015	XLOC_005236	Zasp52	=	NA	10.5834
TCONS_00012030	XLOC_005319	Fen1	=	NA	10.7637
TCONS_00012052	XLOC_005490	CG9416	=	NA	2.33134
TCONS_00012061	XLOC_005734	cv-2	=	NA	8.81825
TCONS_00012088	XLOC_006061	Gprk1	i	NA	8.79553
TCONS_00012099	XLOC_006094	sxc	i	NA	11.5643
TCONS_00012103	XLOC_006100	CG30440	p	NA	0.893249
TCONS_00012105	XLOC_006105	scaf	i	NA	0.463664
TCONS_00012111	XLOC_006124	blow	i	NA	25.7377
TCONS_00012126	XLOC_006187	Sema-2a	i	NA	28.5964
TCONS_00012739	XLOC_006243	rl	j	NA	17.2039
TCONS_00012740	XLOC_006249	MFS17	i	NA	1.71904
TCONS_00012745	XLOC_006271	uex	=	NA	4.49334
TCONS_00012746	XLOC_006277	rl	i	NA	3.07876
TCONS_00012747	XLOC_006278	rl	i	NA	3.05864
TCONS_00012751	XLOC_006297	MFS17	i	NA	2.29271
TCONS_00012752	XLOC_006302	MFS17	i	NA	2.28622
TCONS_00012753	XLOC_006303	MFS17	i	NA	1.12926
TCONS_00012754	XLOC_006303	MFS17	i	NA	3.05121
TCONS_00012755	XLOC_006306	uex	p	NA	1.57989
TCONS_00012756	XLOC_006308	uex	i	NA	5.10471
TCONS_00012757	XLOC_006309	uex	i	NA	7.39067
TCONS_00012758	XLOC_006310	uex	i	NA	4.18665
TCONS_00012759	XLOC_006311	uex	i	NA	4.633
TCONS_00018553	XLOC_006481	CG1240	=	NA	72.9908
TCONS_00018563	XLOC_006658	Ubp64E	j	NA	26.9082
TCONS_00018606	XLOC_007041	CG17826	=	NA	67.3703
TCONS_00018614	XLOC_007097	Wbp2	j	NA	4.76182
TCONS_00018628	XLOC_007234	AGO2	=	NA	40.5382
TCONS_00018636	XLOC_007280	Taf4	=	NA	4.85172
TCONS_00018637	XLOC_007280	Taf4	j	NA	4.84094
TCONS_00018655	XLOC_007497	serp	i	NA	0.733233
TCONS_00018672	XLOC_007634	CG11307	j	NA	4.17355
TCONS_00018675	XLOC_007659	mub	=	NA	11.0222
TCONS_00018691	XLOC_007733	CG17698	=	NA	2.01417
TCONS_00018692	XLOC_007736	CG40045	j	NA	31.7363
TCONS_00018695	XLOC_007771	mth	j	NA	6.30671
TCONS_00018696	XLOC_007771	mth	j	NA	6.97493
TCONS_00018697	XLOC_007771	mth	j	NA	8.90694
TCONS_00018702	XLOC_007811	trio	=	NA	33.2812
TCONS_00018754	XLOC_008423	CG6310	=	NA	5.65851
TCONS_00018775	XLOC_008625	bbg	=	NA	7.43789
TCONS_00018800	XLOC_008818	CG6479	c	NA	1.02692
TCONS_00018810	XLOC_008924	nkd	=	NA	8.12449
TCONS_00018826	XLOC_009042	CG4825	j	NA	4.51199
TCONS_00018836	XLOC_009121	CG32447	=	NA	5.57312
TCONS_00018837	XLOC_009121	CG32447	c	NA	4.65744
TCONS_00018838	XLOC_009121	CG32447	c	NA	2.88677
TCONS_00018839	XLOC_009121	CG32447	c	NA	5.15277
TCONS_00018851	XLOC_009210	SP1173	i	NA	8.26222
TCONS_00018853	XLOC_009220	Srp9	p	NA	0.842334
TCONS_00018863	XLOC_009261	CG11279	p	NA	0.937987
TCONS_00018872	XLOC_009285	Exn	i	NA	4.64521
TCONS_00026119	XLOC_009590	sas	=	NA	42.582
TCONS_00026120	XLOC_009590	sas	=	NA	29.2763
TCONS_00026121	XLOC_009590	sas	=	NA	34.3345
TCONS_00026137	XLOC_009736	ps	i	NA	3.23388
TCONS_00026138	XLOC_009736	ps	j	NA	4.32249
TCONS_00026141	XLOC_009744	MBD-like	j	NA	5.25152
TCONS_00026161	XLOC_009974	CtBP	j	NA	46.4891
TCONS_00026199	XLOC_010426	CG17838	=	NA	69.4272
TCONS_00026200	XLOC_010443	CG5630	=	NA	13.548
TCONS_00026201	XLOC_010443	CG5630	e	NA	8.98241
TCONS_00026205	XLOC_010470	pre-mod(mdg4)-Z	j	NA	20.6939
TCONS_00026211	XLOC_010511	how	j	NA	6.37388
TCONS_00026248	XLOC_010802	Sppl	e	NA	4.428
TCONS_00026254	XLOC_010878	CG14257	=	NA	1.17132
TCONS_00026282	XLOC_011123	CG1607	=	NA	11.6834
TCONS_00026308	XLOC_011420	Ada2b	=	NA	12.5436
TCONS_00026312	XLOC_011461	CG9797	=	NA	4.64386
TCONS_00026315	XLOC_011470	CG9836	=	NA	14.2877
TCONS_00026320	XLOC_011506	mura	=	NA	9.21664
TCONS_00026376	XLOC_012069	PKD	j	NA	29.0639
TCONS_00026377	XLOC_012080	fru	=	NA	25.1169
TCONS_00026378	XLOC_012080	fru	=	NA	27.4168
TCONS_00026394	XLOC_012200	Fancd2	j	NA	83.9388
TCONS_00026416	XLOC_012385	CG10182	=	NA	5.52356
TCONS_00026435	XLOC_012535	CHKov2	j	NA	6.45751
TCONS_00026436	XLOC_012540	Muc96D	=	NA	76.4881
TCONS_00026445	XLOC_012644	Ser	j	NA	8.38036
TCONS_00026455	XLOC_012752	CG2310	=	NA	5.22917
TCONS_00026480	XLOC_012962	ps	p	NA	0.818039
TCONS_00026481	XLOC_012963	mura	i	NA	3.43752
TCONS_00026486	XLOC_012986	CG32473	i	NA	1.2284
TCONS_00026494	XLOC_013008	sra	i	NA	1.51229
TCONS_00026495	XLOC_013009	sra	i	NA	0.757525
TCONS_00026497	XLOC_013012	gish	i	NA	4.66348
TCONS_00026499	XLOC_013015	fru	i	NA	12.4627
TCONS_00027229	XLOC_013125	CG41128	=	NA	36.1989
TCONS_00027230	XLOC_013127	Alg-2	=	NA	36.9624
TCONS_00027237	XLOC_013141	CG41128	p	NA	0.669531
TCONS_00027632	XLOC_013162	zfh2	=	NA	26.4488
TCONS_00027645	XLOC_013206	CG2219	j	NA	6.42667
TCONS_00027646	XLOC_013208	CG2316	=	NA	14.1421
TCONS_00027647	XLOC_013208	CG2316	j	NA	9.8899
TCONS_00027654	XLOC_013231	unc-13	=	NA	25.5261
TCONS_00027659	XLOC_013252	CG2316	i	NA	4.43999
TCONS_00027660	XLOC_013254	Crk	i	NA	17.3001
TCONS_00027661	XLOC_013262	Eph	i	NA	6.56733
TCONS_00027663	XLOC_013267	Slip1	i	NA	8.2892
TCONS_00027664	XLOC_013268	unc-13	i	NA	4.97299
TCONS_00027665	XLOC_013269	unc-13	i	NA	6.27724
TCONS_00027667	XLOC_013274	cals	i	NA	5.51663
TCONS_00027929	XLOC_013283	CG17691	=	NA	10.92
TCONS_00027930	XLOC_013301	CG40625	=	NA	189.451
TCONS_00033052	XLOC_013857	CG34417	=	NA	25.7145
TCONS_00033054	XLOC_013869	CG3168	=	NA	1.47793
TCONS_00033065	XLOC_013956	CG1440	j	NA	13.6266
TCONS_00033073	XLOC_014027	CG9689	=	NA	45.3084
TCONS_00033094	XLOC_014220	Cpr12A	=	NA	26.5433
TCONS_00033128	XLOC_014446	beta-Spec	=	NA	9.93226
TCONS_00033131	XLOC_014451	CG6398	=	NA	19.024
TCONS_00033168	XLOC_014841	Fas2	j	NA	20.1546
TCONS_00033179	XLOC_014981	shf	c	NA	5.74142
TCONS_00033189	XLOC_015125	CG34449	=	NA	6.9001
TCONS_00033190	XLOC_015125	CG34449	j	NA	8.41792
TCONS_00033210	XLOC_015317	Yippee	=	NA	5.68407
TCONS_00033258	XLOC_015636	Rip11	=	NA	6.00306
TCONS_00033259	XLOC_015636	Rip11	=	NA	5.3736
TCONS_00033265	XLOC_015693	CG12237	=	NA	13.8332
TCONS_00033280	XLOC_015844	br	i	NA	25.1434
TCONS_00033315	XLOC_015920	CG4766	p	NA	1.75743
TCONS_00033319	XLOC_015927	CG34417	i	NA	11.992
TCONS_00033332	XLOC_015965	CG34449	i	NA	4.07444
TCONS_00033333	XLOC_015965	CG34449	i	NA	6.395
Priority	Code	Description
1	=	Complete match of intron chain
2	c	Contained
3	j	Potentially novel isoform (fragment): at least one splice junction is shared with a reference transcript
4	e	Single exon transfrag overlapping a reference exon and at least 10 bp of a reference intron, indicating a possible pre-mRNA fragment.
5	i	A transfrag falling entirely within a reference intron
6	o	Generic exonic overlap with a reference transcript
7	p	Possible polymerase run-on fragment (within 2Kbases of a reference transcript)
8	r	Repeat. Currently determined by looking at the soft-masked reference sequence and applied to transcripts where at least 50% of the bases are lower case
9	u	Unknown, intergenic transcript
10	x	Exonic overlap with reference on the opposite strand
11	s	An intron of the transfrag overlaps a reference intron on the opposite strand (likely due to read mapping errors)
12	.	(.tracking file only, indicates multiple classifications)
NA indicates not detected in this sample.
